1 **Cells with Treg-specific *FOXP3* demethylation but low CD25 are prevalent**  
2 **in autoimmunity**

3

4 Ricardo C. Ferreira<sup>1,2</sup>, Henry Z. Simons<sup>2</sup>, Whitney S. Thompson<sup>2</sup>, Daniel B. Rainbow<sup>1,2</sup>, Xin  
5 Yang<sup>2</sup>, Antony J. Cutler<sup>1,2</sup>, Joao Oliveira<sup>2</sup>, Xaquín Castro Dopico<sup>2</sup>, Deborah J. Smyth<sup>2</sup>,  
6 Natalia Savinykh<sup>2</sup>, Meghavi Mashar<sup>2</sup>, Tim Vyse<sup>3</sup>, David B Dunger<sup>4</sup>, Helen Baxendale<sup>5</sup>, Anita  
7 Chandra<sup>5</sup>, Chris Wallace<sup>2</sup>, John A Todd<sup>1,2</sup>, Linda S. Wicker<sup>1,2‡</sup> and Marcin L. Pekalski<sup>1,2‡</sup>.

8

9 <sup>1</sup>JDRF/Wellcome Trust Diabetes and Inflammation Laboratory, Wellcome Trust Centre for  
10 Human Genetics, Nuffield Department of Medicine, NIHR Oxford Biomedical Research  
11 Centre, University of Oxford, Oxford, UK. <sup>2</sup>JDRF/Wellcome Trust Diabetes and  
12 Inflammation Laboratory, Wellcome Trust/MRC Building, Cambridge Institute for Medical  
13 Research, University of Cambridge, Cambridge Biomedical Research Campus, Cambridge,  
14 UK. <sup>3</sup>Department of Medical and Molecular Genetics, King's College Hospital, London, UK.  
15 <sup>4</sup>Department of Paediatrics, School of Clinical Medicine, University of Cambridge,  
16 Cambridge, UK. <sup>5</sup>Department of Clinical Biochemistry and Immunology, Addenbrooke's  
17 Hospital, Cambridge, UK.

18

19 **‡Corresponding Authors:**

20 Prof Linda S Wicker:

21 Wellcome Trust Centre for Human Genetics, Nuffield Department of Medicine, University of  
22 Oxford, Oxford, UK

23 Email: linda.wicker@well.ox.ac.uk

24

25 Dr Marcin L Pekalski:

26 Wellcome Trust Centre for Human Genetics, Nuffield Department of Medicine, University of  
27 Oxford, Oxford, UK

28 Email: marcin.pekalski@well.ox.ac.uk

29 **Highlights:**

30 - FOXP3<sup>+</sup> compartment within CD127<sup>low</sup>CD25<sup>low</sup> T cells is expanded in autoimmune  
31 patients.

32 - Increased numbers of CD25<sup>low</sup>FOXP3<sup>+</sup> T cells are a circulating marker of autoimmunity.

33 - CD25<sup>low</sup>FOXP3<sup>+</sup> HELIOS<sup>+</sup> T cells are fully demethylated at the *FOXP3* TSDR.

34 - CD25<sup>low</sup>FOXP3<sup>+</sup> T cells could represent a terminal stage of regulatory T cells.

35

36

## 37 **Abstract**

38 Identification of alterations in the cellular composition of the human immune system is key to  
39 understanding the autoimmune process. Recently, a subset of FOXP3<sup>+</sup> cells with low CD25  
40 expression was found to be increased in peripheral blood from systemic lupus erythematosus  
41 (SLE) patients, although its functional significance remains controversial. Here we find in  
42 comparisons with healthy donors that the frequency of FOXP3<sup>+</sup> cells within  
43 CD127<sup>low</sup>CD25<sup>low</sup> CD4<sup>+</sup> T cells (here defined as CD25<sup>low</sup>FOXP3<sup>+</sup> T cells) is increased in  
44 patients affected by autoimmune disease of varying severity, from combined  
45 immunodeficiency with active autoimmunity, SLE to type 1 diabetes. We show that  
46 CD25<sup>low</sup>FOXP3<sup>+</sup> T cells share phenotypic features resembling conventional  
47 CD127<sup>low</sup>CD25<sup>high</sup>FOXP3<sup>+</sup> Tregs, including demethylation of the Treg-specific epigenetic  
48 control region in *FOXP3* that is highly enriched in HELIOS<sup>+</sup> cells, and lack of IL-2  
49 production. As compared to conventional Tregs, more CD25<sup>low</sup>FOXP3<sup>+</sup>HELIOS<sup>+</sup> T cells are  
50 in cell cycle (33.0% vs 20.7% Ki-67<sup>+</sup>;  $P = 1.3 \times 10^{-9}$ ) and express the late-stage inhibitory  
51 receptor PD-1 (67.2% vs 35.5%;  $P = 4.0 \times 10^{-18}$ ), while having reduced expression of the  
52 early-stage inhibitory receptor CTLA-4, as well as other Treg markers, such as FOXP3 and  
53 CD15s. The number of CD25<sup>low</sup>FOXP3<sup>+</sup> T cells are highly correlated ( $P = 1.2 \times 10^{-19}$ ) with  
54 the proportion of CD25<sup>high</sup>FOXP3<sup>+</sup> T cells in cell cycle (Ki-67<sup>+</sup>). These findings suggest that  
55 CD25<sup>low</sup>FOXP3<sup>+</sup> T cells represent a subset of Tregs that are derived from CD25<sup>high</sup>FOXP3<sup>+</sup> T  
56 cells, and are a peripheral marker of recent Treg expansion in response to an autoimmune  
57 reaction in tissues.

58

59 **Keywords:** Regulatory T cells (Tregs); Autoimmunity; FOXP3; Treg-specific demethylated  
60 region (TSDR); CD25.

## 61 **1. Introduction**

62 FOXP3<sup>+</sup> regulatory T cells (Tregs) are produced in the thymus as a specific T cell lineage  
63 following high affinity TCR engagement that results in the demethylation of the Treg-  
64 specific demethylated region (TSDR) in *FOXP3* and stable FOXP3 expression [1]. Following  
65 emigration from the thymus and activation, naïve Tregs proliferate and differentiate to  
66 memory Tregs that are actively recruited to peripheral compartments to suppress immune  
67 responses against self and maintain tissue integrity [2]. It is becoming increasingly apparent  
68 that there is considerable heterogeneity in memory Treg subsets in humans [3,4]. One major  
69 challenge for studying human Tregs is that normally only peripheral blood cells from patients  
70 are available, rather than the effector T cells and Tregs present in the inflamed tissue and  
71 associated lymph nodes. A better understanding of the composition of the Treg compartment  
72 in peripheral blood is therefore needed to investigate the potential contribution to disease  
73 mechanisms made by Tregs and to identify cellular alterations of the peripheral compartment  
74 associated with the onset of pathogenic autoimmune manifestations in the tissues.

75

76 Recently, a novel subset of FOXP3<sup>+</sup> cells with low expression of CD25 was reported to be  
77 increased in peripheral blood of autoimmune systemic lupus erythematosus (SLE) patients  
78 [5–9], a finding that was later expanded to the peripheral blood of multiple sclerosis [10] and  
79 rheumatoid arthritis [11] patients. The frequency of this cell subset has been demonstrated to  
80 be associated with increased disease activity in SLE patients [5–7], suggesting that these cells  
81 may be directly pathogenic or biomarkers of flaring autoimmunity. However, the origin of  
82 these cells and their function in SLE patients and healthy individuals remain ambiguous  
83 [12,13]. In the present study, we characterise these CD127<sup>low</sup>CD25<sup>low</sup>FOXP3<sup>+</sup> CD4<sup>+</sup> T cells

84 (henceforth designated as CD25<sup>low</sup>FOXP3<sup>+</sup> cells), and demonstrate that they share phenotypic  
85 features with Tregs, including demethylation of the *FOXP3* TSDR and constitutive  
86 expression of the transcription factor HELIOS in a majority of the cells, and an inability to  
87 produce IL-2 compared to FOXP3<sup>-</sup> Teffs. However, compared to conventional  
88 CD127<sup>low</sup>CD25<sup>high</sup>FOXP3<sup>+</sup> Tregs, CD25<sup>low</sup>FOXP3<sup>+</sup> cells showed increased expression of  
89 activation and proliferation markers such as PD-1 and Ki-67, and reduced expression of  
90 Treg-associated molecules, including FOXP3 and CTLA-4. We suggest that these cells  
91 represent the last stage of the natural life-cycle of TSDR-demethylated Tregs *in vivo* and that  
92 active autoimmunity increases their prevalence.

93

94 **2. Methods**

95 *2.1 Subjects.*

96 Study participants included 34 SLE patients recruited from Guy's and St Thomas' NHS  
97 Foundation Trust. All patients satisfied ACR SLE classification criteria and were allocated a  
98 disease activity using SLEDAI-2K at the time of sampling. SLE patients were compared to a  
99 cohort of 24 age- and sex-matched healthy donors from the Cambridge BioResource (CBR).  
100 A second cohort of 112 healthy donors from the CBR was used for the analysis of Ki-67  
101 expression within the assessed T cell subsets.

102

103 Combined immunodeficiency patients (CID; N=7) were recruited from Cambridge University  
104 Hospitals and Papworth Hospital NHS Foundation Trusts, and compared to six age- and sex-  
105 matched healthy donors from the CBR. Patients were selected on the presentation of immune  
106 infiltration in the lungs and active autoimmunity in the absence of a known genetic cause,  
107 although the clinical symptoms were consistent with those associated with recently  
108 characterised *CTLA4* germline mutations [14].

109

110 Adult long-standing T1D patients (N=15) and healthy controls (HC; N=15) were recruited  
111 from the CBR. Newly diagnosed T1D patients (ND; N=49) and unaffected siblings of other  
112 T1D probands (N=40) were collected from the JDRF Diabetes–Genes, Autoimmunity and  
113 Prevention (D-GAP) study (<http://paediatrics.medschl.cam.ac.uk/research/clinical-trials/>).  
114 ND patients were characterised as having been diagnosed with T1D less than two years prior  
115 to their blood donation (with one exception of 42 months). Unaffected siblings were islet  
116 autoantibody-negative (IAA, IA2, GAD and ZnT8), and were not related to any T1D patient  
117 included in this study. All donors were of white ethnicity and all healthy controls and

118 unaffected siblings were individuals without autoimmune disease (self-reported). Baseline  
119 characteristics for all participating subjects are summarised in **Table 1**.

120

### 121 *2.2 Ethics.*

122 All samples and information were collected with written and signed informed consent. The  
123 D-GAP study was approved by the Royal Free Hospital & Medical School research ethics  
124 committee; REC (08/H0720/25). Adult long-standing T1D patients and healthy volunteers  
125 were enrolled in the CBR. The study was approved by the local Peterborough and Fenland  
126 research ethics committee (05/Q0106/20). Informed consent was obtained from CID  
127 patients, parents, or both (R&D Ref: P01685, REC Ref: 12/WA/0148). The study conformed  
128 to the Declaration of Helsinki and all local ethical requirements.

129

### 130 *2.3 PBMC sample preparation.*

131 PBMCs were isolated by Ficoll gradient centrifugation and cryopreserved in 10% heat-  
132 inactivated human AB serum, as described previously [15]. T1D patients and healthy controls  
133 were recruited contemporaneously and samples were processed and stored by the same  
134 investigators to prevent spurious findings caused by differential sample preparation.

135

136 Cryopreserved PBMCs ( $10 \times 10^6$  per donor) were thawed at 37°C and resuspended in X-VIVO  
137 (Lonza) + 1% heat-inactivated, filtered human AB serum (Sigma). Cell viability following  
138 resuscitation was assessed in a subset of 40 donors using the Fixable Viability Dye eFluor  
139 780 (eBioscience) and was found to be consistently very high (95.6%; min = 86.8%, max =  
140 98.2%) for all samples analysed in this study.

141

142 *2.4 Cell culture and in vitro stimulation.*

143 To reduce the effects of experimental variation and other potential covariates, PBMC samples  
144 were processed in batches of a minimum of ten samples per day. T1D patients and healthy  
145 controls were matched as closely as possible for age (within 5 year age-bands), sex and time  
146 of sample preparation.

147

148 After thawing, PBMCs were resuspended in RPMI medium (Gibco) supplemented with 10%  
149 FBS, 2 mM L-Glutamine and 100 µg/mL Pen-Strep and cultured ( $10^6$  PBMCs/well) in 24-  
150 well flat-bottom cell culture plate (BD). For cytokine production assays, cells were initially  
151 rested for 30 min at 37°C and then cultured in the presence or absence of 5 ng/mL PMA, 100  
152 ng/mL ionomycin and 0.67 µl/mL Monensin GolgiStop (BD Biosciences) for four hours at  
153 37 °C. For a subset of 66 donors,  $10^6$  cells were cultured with medium alone and 0.67 µl/mL  
154 Monensin to determine background levels of cytokine production in unstimulated cells.

155

156 *2.5 Intracellular immunostainings.*

157 After activation, PBMCs were harvested, and stained with Fixable Viability Dye eFluor 780  
158 for 20 min at 4°C. Cells were then stained with fluorochrome-conjugated antibodies against  
159 surface receptors (see **Supplementary Table 1**) for one hour at 4°C. Fixation and  
160 permeabilisation was performed using FOXP3 Fix/Perm Buffer Set (BioLegend) and cells  
161 were then stained with intracellular antibodies for one hour at 4°C (see **Supplementary**  
162 **Table 1**). All experiments were performed in an anonymised, blinded manner without prior  
163 knowledge of disease state.

164

165 *2.6 Flow cytometry.*



166 Immunostained samples were acquired using a BD Fortessa (BD Biosciences) flow cytometer  
167 with FACSDiva software (BD Biosciences) and analysed using FlowJo (Tree Star, Inc.).  
168 Dead-cell exclusion based on the Fixable Viability Dye was performed for the intracellular  
169 immunostainings.

170

171 *2.7 Analysis of the epigenetic demethylation profile by next-generation sequencing.*

172 Total PBMCs from seven healthy CBR donors (three males and four females) were stained  
173 with fluorophore-conjugated antibodies (see **Supplementary Table 1**) and sorted using a BD  
174 Aria Fusion flow cytometer (BD Biosciences). Methylation of the *FOXP3* TSDR was  
175 performed using a next-generation sequencing method, as described previously [16].

176

177 *2.8 Statistical analyses.*

178 Statistical analyses were performed using Prism software (GraphPad) and Stata  
179 ([www.stata.com](http://www.stata.com)). Association of the assessed T-cell phenotypes with T1D, SLE and CID  
180 was calculated using two-tailed unpaired student's t-tests. The effects of age, sex and time of  
181 collection were controlled by the experimental design used in this study and, therefore, not  
182 included as additional covariates. Given that most immune phenotypes showed moderate to  
183 strong right skew that violated the assumption of normality, the phenotypes were log-  
184 transformed before statistical testing.

185

186 Comparison of the expression of the interrogated immune markers between  
187 CD127<sup>low</sup>CD25<sup>low</sup>FOXP3<sup>+</sup> CD4<sup>+</sup> T cells and: (i) CD25<sup>high</sup>FOXP3<sup>+</sup>, (ii) CD25<sup>high</sup>FOXP3<sup>-</sup> and  
188 (iii) CD25<sup>low</sup>FOXP3<sup>-</sup> CD4<sup>+</sup> T cells was performed within individuals using two-tailed paired  
189 student's t-tests. The correlations between immune subsets were calculated using linear

190 regression analysis.

191

### 192 3. Results

193

194 *3.1 Frequency of CD25<sup>low</sup>FOXP3<sup>+</sup> cells is increased in blood from patients with active*  
195 *autoimmunity.*

196 To investigate the peripheral alterations in peripheral FOXP3<sup>+</sup> T cell subsets, we performed a  
197 detailed immunophenotyping characterisation of cryopreserved peripheral blood  
198 mononuclear cells (PBMCs) of different cohorts of autoimmune patients (summarised in  
199 **Table 1**). Analysis of the flow cytometry profile of patients with systemic autoimmune  
200 manifestations as compared to healthy donors revealed that the frequency of FOXP3<sup>+</sup> cells is  
201 highly increased in CD127<sup>low</sup> cells of some patients. We found that among SLE and CID  
202 patients with increased CD127<sup>low</sup> FOXP3-expressing cells there is a notable loss of CD25  
203 expression, which results in an extremely high frequency of CD127<sup>low</sup>CD25<sup>low</sup>FOXP3<sup>+</sup> cells  
204 (**Fig. 1A**). These findings suggest that the frequency of FOXP3<sup>+</sup> cells in the  
205 CD127<sup>low</sup>CD25<sup>low</sup> T cell subset (CD25<sup>low</sup>FOXP3<sup>+</sup> cells; depicted in red in **Fig. 1B**) is  
206 increased as a result of an active autoimmune response and could be a specific marker of  
207 Treg activation. Given the lack of peripheral markers that reflect chronic immune activation,  
208 we therefore decided to focus our analysis on this population of CD25<sup>low</sup>FOXP3<sup>+</sup> cells, and  
209 investigate their frequency in the peripheral blood of autoimmune patients.

210

211 Consistent with previous findings [7,8], we confirmed that the frequency of FOXP3<sup>+</sup> cells  
212 among CD127<sup>low</sup>CD25<sup>low</sup> T cells (gating strategy **Fig. 1B**) was markedly increased in SLE  
213 patients (geometric mean (GeoM) = 13.53%) compared to age- and sex-matched healthy  
214 controls (5.51%,  $P = 2.1 \times 10^{-5}$ ,  $N = 24$ , **Fig. 1C**), which likely reflects the systemic immune  
215 activation in SLE patients. In support of this hypothesis, we also detected a high frequency

216 of CD25<sup>low</sup>FOXP3<sup>+</sup> cells in a small cohort of seven CID patients, characterised by severe  
217 active autoimmunity compared to age- and sex-matched healthy controls (12.14% and 4.00%,  
218 respectively,  $P = 6.5 \times 10^{-3}$ ; **Fig. 1C**).

219

220 We also found that the frequency of FOXP3<sup>+</sup> cells among CD127<sup>low</sup>CD25<sup>low</sup> T cells was  
221 significantly increased in T1D patients (6.84%) compared to age- and sex-matched healthy  
222 controls (4.55%;  $P = 2.7 \times 10^{-6}$ ; **Fig. 1D**). This association was also observed when  
223 comparing the frequency of CD25<sup>low</sup>FOXP3<sup>+</sup> cells within total CD4<sup>+</sup> T cells (0.32% vs  
224 0.23% in T1D patients and controls, respectively;  $P = 1.1 \times 10^{-3}$ ; **Supplementary Fig. 1A**),  
225 and was not associated with duration of disease, ranging from 2 months to 23 years ( $P =$   
226 0.61). We replicated the finding of increased FOXP3<sup>+</sup> cells among CD127<sup>low</sup>CD25<sup>low</sup> T cells  
227 in an independent cohort of 15 long-standing T1D patients (10.39%) and 15 age- and sex-  
228 matched healthy controls (6.29%;  $P = 7.7 \times 10^{-3}$ ; **Supplementary Fig. 1B**). Furthermore, we  
229 noted that the increased frequency of FOXP3<sup>+</sup> cells was mainly restricted to the  
230 CD127<sup>low</sup>CD25<sup>low</sup> T cell subset, as we observed only a small increased frequency of  
231 conventional CD127<sup>low</sup>CD25<sup>high</sup>FOXP3<sup>+</sup> Tregs in T1D patients (5.55%) compared to healthy  
232 donors (4.82%;  $P = 8.0 \times 10^{-3}$ ; **Supplementary Fig. 2**).

233

234 *3.2 CD25<sup>low</sup>FOXP3<sup>+</sup> cells are demethylated at the FOXP3 TSDR.*

235 In humans FOXP3 is not exclusively expressed in Tregs, but can also be transiently up-  
236 regulated in activated Teffs. However, in thymically-derived Tregs constitutive expression of  
237 *FOXP3* is known to require a demethylated TSDR [2]. To assess the TSDR methylation  
238 profile of CD25<sup>low</sup>FOXP3<sup>+</sup> cells we sorted these cells from four healthy donors, and  
239 compared the methylation of the TSDR in CD25<sup>low</sup>FOXP3<sup>+</sup> cells, conventional

240 CD25<sup>high</sup>FOXP3<sup>+</sup> Tregs and the respective FOXP3<sup>-</sup> subsets (**Fig. 2A**). We found that the  
241 majority of CD25<sup>low</sup>FOXP3<sup>+</sup> cells were demethylated at the TSDR (**Fig. 2B,C**). The  
242 epigenetic demethylation pattern in CD25<sup>low</sup>FOXP3<sup>+</sup> cells was similar to CD25<sup>high</sup>FOXP3<sup>+</sup>  
243 Tregs at all nine interrogated CpG sites in the *FOXP3* TSDR (mean = 57.1% and 80.5%  
244 demethylation, respectively; **Fig. 2B**); in contrast, <7% of CD25<sup>low</sup>FOXP3<sup>-</sup> and  
245 CD25<sup>high</sup>FOXP3<sup>-</sup> cells had demethylated TSDRs. These findings indicate the majority of  
246 CD25<sup>low</sup>FOXP3<sup>+</sup> cells are *bona fide* Tregs, and are not Tregs transiently upregulating FOXP3  
247 expression as a result of immune activation.

248

249 *3.3 CD25<sup>low</sup>FOXP3<sup>+</sup> cells express the Treg-specific HELIOS transcription factor and exhibit*  
250 *features of an activated phenotype.*

251 Having established that a majority of CD25<sup>low</sup>FOXP3<sup>+</sup> cells are stably demethylated at the  
252 *FOXP3* TSDR, we next performed a detailed phenotypic characterisation of this immune  
253 subset by flow cytometry in 24 healthy adult donors to investigate phenotypic similarities and  
254 differences between CD25<sup>low</sup>FOXP3<sup>+</sup> and classical Tregs (CD25<sup>high</sup>FOXP3<sup>+</sup>). One  
255 distinguishing feature of these cells was the higher frequency of memory phenotype  
256 (CD45RA<sup>-</sup>) cells compared to their CD25<sup>high</sup>FOXP3<sup>+</sup> counterparts (83.8% and 64.7%  
257 CD45RA<sup>-</sup> cells, respectively;  $P = 2.0 \times 10^{-11}$ ; **Fig. 3A**). This difference was particularly  
258 noticeable among the younger cohort (median age = 14 years) of 116 T1D patients and  
259 unaffected siblings (76.9% and 43.4%, respectively;  $P = 1.2 \times 10^{-58}$ ; **Fig. 3B**), which have a  
260 higher proportion of CD45RA<sup>+</sup> naïve cells amongst their CD25<sup>high</sup>FOXP3<sup>+</sup> conventional  
261 Tregs compared to adult donors, suggesting that the majority of CD25<sup>low</sup>FOXP3<sup>+</sup> cells have  
262 responded previously to antigen following their emigration from the thymus. Since the  
263 majority of CD25<sup>low</sup>FOXP3<sup>+</sup> cells are CD45RA<sup>-</sup>, we focused further analyses on memory

264 FOXP3<sup>+</sup> cells.

265

266 We found that an increased frequency of CD45RA<sup>-</sup> CD25<sup>low</sup>FOXP3<sup>+</sup> cells express the  
267 proliferation marker Ki-67 compared to their CD25<sup>high</sup>FOXP3<sup>+</sup> counterparts (29.9% and  
268 22.0%, respectively;  $P = 2.7 \times 10^{-7}$ ; **Fig. 3C**). In addition to Ki-67, CD45RA<sup>-</sup>  
269 CD25<sup>low</sup>FOXP3<sup>+</sup> cells were also characterised by a marked increased frequency of PD-1<sup>+</sup>  
270 cells compared to CD25<sup>high</sup>FOXP3<sup>+</sup> Tregs (65.1% and 38.3%, respectively;  $P = 1.7 \times 10^{-17}$ ;  
271 **Fig. 3D**), and had a frequency of PD-1<sup>+</sup> cells more similar to their CD25<sup>low</sup>FOXP3<sup>-</sup>  
272 counterparts (67.2%; **Fig. 3D**).

273

274 Furthermore, we demonstrated that, similarly to CD25<sup>high</sup>FOXP3<sup>+</sup> CD45RA<sup>-</sup> memory Tregs,  
275 the majority of CD25<sup>low</sup>FOXP3<sup>+</sup> CD45RA<sup>-</sup> memory cells also express the transcription factor  
276 HELIOS, although the proportion of HELIOS<sup>+</sup> cells was significantly lower (51.1%)  
277 compared to CD25<sup>high</sup>FOXP3<sup>+</sup> CD45RA<sup>-</sup> memory Tregs (77.8%;  $P = 3.0 \times 10^{-12}$ ; **Fig. 4A,**  
278 **B**). Consistent with the reduction in CD25 and HELIOS, CD25<sup>low</sup>FOXP3<sup>+</sup> cells also showed  
279 a significantly lower expression of other classical Treg markers compared to  
280 CD25<sup>high</sup>FOXP3<sup>+</sup> Tregs, such as TIGIT (65.1% vs 78.0%;  $P = 3.7 \times 10^{-8}$ ), CD15s (20.7% vs  
281 33.5%;  $P = 5.8 \times 10^{-12}$ ) and most notably, CTLA-4 (60.0% vs 84.7%;  $P = 9.4 \times 10^{-11}$ ; **Fig.**  
282 **4A, B**). Furthermore, we found that the expression of FOXP3 was markedly lower in  
283 CD25<sup>low</sup>FOXP3<sup>+</sup> cells compared to CD25<sup>high</sup>FOXP3<sup>+</sup> Tregs (MFI = 1171 and 2160  
284 respectively,  $P = 3.6 \times 10^{-11}$ ; **Fig. 4C**), suggesting that CD25<sup>low</sup>FOXP3<sup>+</sup> cells show a  
285 decreased expression of classical Treg-associated molecules.

286

287 *3.4 HELIOS<sup>+</sup> CD45RA<sup>-</sup> CD25<sup>low</sup>FOXP3<sup>+</sup> cells are demethylated at the FOXP3 TSDR to the*

288 *same degree as conventional HELIOS<sup>+</sup> CD45RA<sup>-</sup> CD25<sup>high</sup> FOXP3<sup>+</sup> Tregs.*

289 To further investigate the methylation profile of FOXP3<sup>+</sup> cells, we next assessed the TSDR

290 methylation in the HELIOS<sup>+</sup> and HELIOS<sup>-</sup> subsets in three additional healthy donors. In

291 agreement with their putative Treg lineage, we confirmed that the HELIOS<sup>+</sup> subsets of both

292 CD25<sup>low</sup>FOXP3<sup>+</sup> cells and conventional CD25<sup>high</sup>FOXP3<sup>+</sup> Tregs are virtually completely

293 demethylated at the *FOXP3* TSDR (>95%; **Fig. 5A**). In contrast, the HELIOS<sup>-</sup> subsets of

294 CD25<sup>low</sup>FOXP3<sup>+</sup> cells and conventional CD25<sup>high</sup>FOXP3<sup>+</sup> Tregs showed a much lower

295 portion of cells demethylated at the TSDR (21% and 64%, respectively). Since HELIOS

296 expression is highly enriched in FOXP3<sup>+</sup> cells demethylated at the TSDR, we examined other

297 phenotypes within the FOXP3<sup>+</sup> cells stratified by HELIOS expression. CD25<sup>low</sup>FOXP3<sup>+</sup>

298 cells demethylated at the TSDR as defined by HELIOS expression had a higher proportion in

299 cell cycle as compared to CD25<sup>high</sup>FOXP3<sup>+</sup> cells expressing HELIOS (33.0% and 20.7%,

300 respectively; **Fig. 5B,C**). In addition, the proportion of cells expressing PD-1 and the per cell

301 level of PD-1 were both increased on CD25<sup>low</sup>FOXP3<sup>+</sup> demethylated at the TSDR as

302 compared to their CD25<sup>high</sup> counterparts (**Fig. 5B,C**). Expression of TIGIT, CTLA-4 and

303 CD15s were also compared (**Supplementary Fig. 3**) with HELIOS stratification revealing a

304 high percentage (>89%) of TIGIT<sup>+</sup> cells in both populations of demethylated FOXP3<sup>+</sup> cells,

305 but a reduced number expressing CD15s and CTLA-4 in the CD25<sup>low</sup>FOXP3<sup>+</sup> cells

306 demethylated at the TSDR as compared to their CD25<sup>high</sup> counterparts. High expression of

307 CTLA-4 was present on CD25<sup>high</sup>FOXP3<sup>+</sup>HELIOS<sup>-</sup> cells, a population with >50% of the

308 cells having a demethylated TSDR (**Fig. 5A**). Expression of FOXP3 was found to be

309 significantly higher within both conventional CD25<sup>high</sup> Tregs (MFI > 2100) compared to

310 CD25<sup>low</sup>FOXP3<sup>+</sup> HELIOS<sup>+</sup> T cells (MFI = 1590), despite their demethylated TSDR.

311 Notably, the expression of FOXP3 was markedly lower in CD25<sup>low</sup>FOXP3<sup>+</sup> HELIOS<sup>-</sup> T cells

312 (MFI = 952), which is consistent with their methylated TSDR (**Supplementary Fig. 3**).  
313 Furthermore, analysis of CD45RA<sup>+</sup> expression revealed a significantly lower frequency of  
314 CD45RA<sup>+</sup> cells within total CD25<sup>low</sup>FOXP3<sup>+</sup> HELIOS<sup>+</sup> cells (4.7%) compared to their  
315 CD25<sup>high</sup> counterparts (20.8%;  $P = 2.0 \times 10^{-12}$ ; **Supplementary Fig. 3**). These data suggest  
316 that most of the CD45RA<sup>+</sup> cells observed within CD25<sup>low</sup>FOXP3<sup>+</sup> T cells are memory  
317 effector T cells that have re-expressed CD45RA on their surface and are characterized by  
318 being HELIOS<sup>-</sup> and expressing lower levels of FOXP3. Finally, since it was possible that the  
319 expansion of CD25<sup>low</sup>FOXP3<sup>+</sup> HELIOS<sup>-</sup> cells (most of which lack a demethylated TSDR and  
320 might be activated effector cells) could have been responsible for the increase of  
321 CD25<sup>low</sup>FOXP3<sup>+</sup> cells in autoimmune patients (**Fig. 1B,C**), we examined the distribution of  
322 HELIOS<sup>+</sup> and HELIOS<sup>-</sup> cells within the CD25<sup>low</sup>FOXP3<sup>+</sup> subset. We determined that  
323 HELIOS<sup>+</sup> CD25<sup>low</sup>FOXP3<sup>+</sup> cells were increased in SLE, CID and T1D patients as compared  
324 to their healthy control cohorts (**Supplementary Fig. 4A,B**) similar to the findings with  
325 CD25<sup>low</sup>FOXP3<sup>+</sup> cells (**Fig. 1C,D**) and that HELIOS<sup>+</sup> cells contributed significantly to all  
326 cohorts examined (**Supplementary Fig. 4C,D**).

327

### 328 *3.5 Low IL-2 production from HELIOS<sup>+</sup>CD45RA<sup>-</sup> CD25<sup>low</sup>FOXP3<sup>+</sup> cells.*

329 To characterise the function of HELIOS<sup>+</sup>CD45RA<sup>-</sup> CD25<sup>low</sup>FOXP3<sup>+</sup> cells, we assessed the  
330 production of two key cytokines, IL-2 and IFN- $\gamma$ , in ten donors (five T1D patients and five  
331 healthy controls) following *in vitro* stimulation (**Fig. 6**). Consistent with their Treg-like  
332 phenotype, we found that both the HELIOS<sup>+</sup>CD45RA<sup>-</sup> CD25<sup>low</sup>FOXP3<sup>+</sup> and  
333 CD25<sup>high</sup>FOXP3<sup>+</sup> subsets, which are highly demethylated at the TSDR (**Fig. 5A**), showed a  
334 low frequency of IL-2<sup>+</sup> (2.0% and 1.0%, respectively) and IFN- $\gamma$ <sup>+</sup> cells (5.1% and 1.4%,  
335 respectively; **Fig. 6B,C**). This was in marked contrast with the HELIOS<sup>+</sup>CD25<sup>low</sup>FOXP3<sup>-</sup>



336 subset, which was found to secrete significantly higher levels of both IL-2 (21.3%;  $P = 2.8 \times$   
337  $10^{-5}$ ; **Fig. 6B**) and IFN- $\gamma$  (27.9%;  $P = 1.1 \times 10^{-3}$ ; **Fig. 6C**), compared their FOXP3<sup>+</sup>  
338 counterparts (2.0% and 5.1% for IL-2 and IFN- $\gamma$ , respectively). In agreement with their  
339 regulatory phenotype, we found a strong reduction of IL-2<sup>+</sup> and IFN- $\gamma$ <sup>+</sup> cells (2.0% and 5.1%,  
340 respectively) in HELIOS<sup>+</sup>CD45RA<sup>-</sup>CD127<sup>low</sup>CD25<sup>low</sup>FOXP3<sup>+</sup> cells compared to  
341 conventional Teffs (59.8%,  $P = 5.3 \times 10^{-9}$  and 63.5%,  $P = 2.0 \times 10^{-7}$  for IL-2<sup>+</sup> and IFN- $\gamma$ <sup>+</sup>  
342 cells, respectively; **Fig. 6B,C**).

343

344 As compared to the HELIOS<sup>+</sup> fraction, we found that a higher portion of HELIOS<sup>-</sup>  
345 CD45RA<sup>-</sup>CD25<sup>low</sup>FOXP3<sup>+</sup> cells produced IFN- $\gamma$  (**Fig. 6A, Supplementary Fig. 5A**). These  
346 findings are consistent with a previous study, showing that HELIOS<sup>-</sup>FOXP3<sup>+</sup> T cells  
347 produced IFN- $\gamma$ , and were increased among T1D patients [17]. Although we found no  
348 evidence for differential IFN- $\gamma$  production in T1D patients compared to healthy controls  
349 among HELIOS<sup>-</sup>CD45RA<sup>-</sup>CD127<sup>low</sup>CD25<sup>low</sup>FOXP3<sup>+</sup> cells, on a per cell basis  
350 (**Supplementary Fig. 5B**), the higher frequency of the CD25<sup>low</sup>FOXP3<sup>+</sup> subset among  
351 patients resulted in a significant increase in the frequency of circulating FOXP3<sup>+</sup> cells with  
352 the capability to produce IFN- $\gamma$  following stimulation among total CD4<sup>+</sup> T cells ( $P = 2.5 \times$   
353  $10^{-3}$ ; **Supplementary Fig. 5C**). These data suggest that HELIOS<sup>-</sup>CD45RA<sup>-</sup>  
354 CD127<sup>low</sup>CD25<sup>low</sup>FOXP3<sup>+</sup> cells contributed to the increased frequency of IFN- $\gamma$ <sup>+</sup> cells  
355 reported among FOXP3<sup>+</sup> cells from T1D patients [17].

356

357 *3.6 CD25<sup>low</sup>FOXP3<sup>+</sup> T cells are highly correlated with proliferating CD25<sup>high</sup>FOXP3<sup>+</sup> Tregs.*

358 To investigate the possible relationship between CD25<sup>high</sup> and CD25<sup>low</sup>FOXP3<sup>+</sup>HELIOS<sup>+</sup>

359 Tregs, we hypothesized that if CD25<sup>high</sup> FOXP3<sup>+</sup> HELIOS<sup>+</sup> Tregs are the precursors of the  
360 CD25<sup>low</sup> FOXP3<sup>+</sup> HELIOS<sup>+</sup> T cell subset, the numbers of CD25<sup>high</sup> Tregs in cycle (Ki-67<sup>+</sup>)  
361 and CD25<sup>low</sup> FOXP3<sup>+</sup> HELIOS<sup>+</sup> T cells should be correlated. This correlation would be  
362 required to maintain homeostasis of Treg numbers such that as memory CD25<sup>high</sup> Tregs are  
363 required to increase in peripheral compartments to respond to inflammatory conditions, a  
364 higher Treg turnover would lead to more CD25<sup>high</sup> Tregs moving into the CD25<sup>low</sup>  
365 compartment and ultimately to cell death. We assessed the total numbers of CD45RA<sup>-</sup> Ki-  
366 67<sup>+</sup> Tregs both in the cohort of 24 healthy volunteers (cohort 1) and in an independent  
367 replication cohort (cohort 2) of 112 healthy volunteers. We found that the frequency of  
368 CD45RA<sup>-</sup> CD4<sup>+</sup> Ki-67<sup>+</sup> CD25<sup>high</sup> FOXP3<sup>+</sup> HELIOS<sup>+</sup> Tregs was significantly correlated with  
369 the frequency of CD25<sup>low</sup> FOXP3<sup>+</sup> HELIOS<sup>+</sup> T cells within total memory CD4<sup>+</sup> T cells ( $r^2 =$   
370  $0.18$ ,  $P = 3.1 \times 10^{-7}$ ; **Fig. 7A**). Similarly, we observed a strong correlation between the  
371 numbers of in-cycle Ki-67<sup>+</sup> Tregs and the CD25<sup>high</sup> FOXP3<sup>+</sup> HELIOS<sup>+</sup> Treg compartment ( $r^2 =$   
372  $0.46$ ,  $P = 1.2 \times 10^{-19}$ ; **Fig. 7B**), as well as a significant correlation between both the total  
373 CD25<sup>low</sup> and CD25<sup>high</sup> FOXP3<sup>+</sup> HELIOS<sup>+</sup> T cell compartments ( $r^2 = 0.15$ ,  $P = 3.9 \times 10^{-6}$ ; **Fig.**  
374 **7C**). These observed correlations were very consistent within both cohorts of healthy  
375 volunteers, and suggest that proliferation of conventional CD25<sup>high</sup> FOXP3<sup>+</sup> HELIOS<sup>+</sup> T cells  
376 is critical to promote the homeostatic repopulation of the CD25<sup>high</sup> Treg subset, which is  
377 maintained at a steady state frequency through the progression of a proportion of CD25<sup>high</sup>  
378 Tregs to the CD25<sup>low</sup> FOXP3<sup>+</sup> HELIOS<sup>+</sup> compartment.  
379

#### 380 **4. Discussion**

381 The identification of reliable biomarkers of disease activity has been a major challenge of  
382 autoimmune diseases, particularly in organ-specific diseases, such as T1D, where there is  
383 limited access to the inflamed tissues. In this study we characterised a subset of FOXP3<sup>+</sup>  
384 CD127<sup>low</sup>CD25<sup>low</sup> T cells, and show that it could be a peripheral biomarker of a recent  
385 autoimmune reaction in the tissues. We showed that in addition to SLE, where the increase  
386 of FOXP3<sup>+</sup> CD25<sup>low</sup> T cells has been observed in multiple SLE studies [5–9], the proportion  
387 of FOXP3<sup>+</sup> cells in the CD127<sup>low</sup>CD25<sup>low</sup> subset is increased in CID and T1D patients.  
388 Although the frequency of FOXP3<sup>+</sup> cells in the CD127<sup>low</sup>CD25<sup>low</sup> subset was compared in  
389 T1D patients versus controls in one previous study with no difference observed [13], we note  
390 that the number of participants was small: 10 healthy control individuals and 16 patients. In  
391 contrast, Zoka et al [18] observed that the proportion of CD25<sup>low</sup> cells among FOXP3<sup>+</sup>CD4<sup>+</sup>  
392 T cells is higher in T1D patients than in controls, a phenotype consistent with our  
393 observations.

394

395 A major strength of this study is that we were able to use a recently developed assay [16] to  
396 precisely assess the methylation status of the *FOXP3* TSDR of CD25<sup>low</sup>FOXP3<sup>+</sup> cells, a  
397 feature that was lacking in the previous SLE studies [7,8] or studies of this subset from  
398 healthy individuals [13]. This method provides a more quantitative assessment of the  
399 methylation pattern of the *FOXP3* locus [16] in the different immune subsets, which allowed  
400 us to demonstrate that the epigenetic profile of CD25<sup>low</sup>FOXP3<sup>+</sup> cells was remarkably similar  
401 to conventional CD25<sup>high</sup> FOXP3<sup>+</sup> Tregs (57.1% and 80.5% demethylated at the TSDR,  
402 respectively). We went on to define that this epigenetic similarity was caused primarily by  
403 the TSDR methylation status of HELIOS<sup>+</sup> cells: virtually all HELIOS<sup>+</sup> cells were found to be

404 demethylated in both the CD25<sup>high</sup> and CD25<sup>low</sup> FOXP3<sup>+</sup> subsets. This finding is consistent  
405 with a previous study assessing the *FOXP3* TSDR methylation profile in different  
406 CD4<sup>+</sup>CD127<sup>low</sup> T-cell subsets discriminated by their expression of FOXP3 and CD25 [19].  
407 The majority of CD25<sup>low</sup>FOXP3<sup>+</sup> cells sorted from synovial fluid mononuclear cells of  
408 juvenile idiopathic arthritis patients were shown to have a demethylated *FOXP3* TSDR,  
409 suggesting that this subset may be enriched at inflammatory sites [19]. In the current study  
410 we also found that the proportion of cells expressing TIGIT was elevated over 2-fold in both  
411 FOXP3<sup>+</sup>HELIOS<sup>+</sup> subsets as compared to their FOXP3<sup>+</sup>HELIOS<sup>-</sup> counterparts. Stable  
412 demethylation of the *FOXP3* TSDR occurs in the thymus upon strong T-cell receptor  
413 stimulation [1], therefore suggesting that CD25<sup>low</sup> FOXP3<sup>+</sup>HELIOS<sup>+</sup> cells are *bona-fide*  
414 thymically-derived Tregs that have lost the expression of CD25.  
415  
416 In further support of the hypothesis that CD25<sup>low</sup>FOXP3<sup>+</sup> HELIOS<sup>+</sup> T cells are in fact a  
417 subset of the classical FOXP3<sup>+</sup> Treg subset, these cells were unable to produce IL-2  
418 following *in vitro* activation. This finding was in contrast with the report by Yang *et al* [8]  
419 that CD25<sup>low</sup>FOXP3<sup>+</sup> T cells from new-onset SLE patients were able to secrete IL-2.  
420 However, we note that the IL-2 production reported in Yang *et al* was much lower compared  
421 to CD25<sup>high</sup>FOXP3<sup>-</sup> Tregs, and immune subsets were not stratified based on the expression of  
422 CD127, CD45RA and HELIOS. It is therefore likely that the residual production of IL-2  
423 observed by Yang *et al* in CD25<sup>low</sup>FOXP3<sup>+</sup> T cells was due primarily to HELIOS<sup>-</sup> T cells. In  
424 contrast, in our study we demonstrate that CD45RA<sup>-</sup> CD25<sup>low</sup>CD127<sup>low</sup> HELIOS<sup>+</sup>FOXP3<sup>+</sup>  
425 cells have a profound inability to produce IL-2 as compared to CD127<sup>+</sup>CD25<sup>high</sup> CD45RA<sup>-</sup>  
426 HELIOS<sup>-</sup>FOXP3<sup>-</sup> Tregs. We also noted the overall heterogeneity in the CD127<sup>low</sup> subset in  
427 regard to IL-2 and IFN- $\gamma$  secretion (**Fig. 6**). A similar proportion of CD127<sup>low</sup> cells lacking

428 both FOXP3 and HELIOS expression secrete IL-2 and IFN- $\gamma$  as compared to their CD127<sup>+</sup>  
429 counterparts and are likely effector T cells. In healthy individuals we observed that these  
430 putative effector cells are the largest portion of the CD45RA<sup>-</sup> CD25<sup>low</sup>CD127<sup>low</sup> gate (**Fig.**  
431 **1B**), consistent with previous observations [13].

432

433 In addition to reduced levels of CD25, CD25<sup>low</sup> HELIOS<sup>+</sup>FOXP3<sup>+</sup> Tregs had lower  
434 expression of CTLA-4, CD15s and FOXP3 as compared to CD25<sup>high</sup> HELIOS<sup>+</sup>FOXP3<sup>+</sup>  
435 Tregs, suggesting that CD25<sup>low</sup> Tregs could have decreased suppressive function. One  
436 limitation of our study is that we are not able to directly assess the suppressive capacity of  
437 CD25<sup>low</sup> HELIOS<sup>+</sup>FOXP3<sup>+</sup> cells, as sorting on the intracellular transcription factors  
438 precludes the use of these cells for functional assays and surrogate surface markers are not  
439 yet defined. Also, as described above, the CD45RA<sup>-</sup> CD25<sup>low</sup>CD127<sup>low</sup> gate has a high  
440 proportion of effector cells present making the results of suppression experiments using  
441 populations of cells gated as CD25<sup>low</sup>CD127<sup>low</sup> difficult to interpret. Notably, despite the  
442 cellular heterogeneity inherent in the CD25<sup>low</sup>CD127<sup>low</sup> subset, two studies did test the  
443 suppressive capacity of sorted CD25<sup>low</sup>CD127<sup>low</sup> CD4<sup>+</sup> T cells [7,13]. Suppression of  
444 proliferation by Tregs was mediated by CD25<sup>low</sup>CD127<sup>low</sup> CD4<sup>+</sup> T cells in both studies;  
445 however IFN- $\gamma$  secretion by Tregs was not suppressed in the one study that examined this  
446 parameter [7]. The reduced suppression mediated by CD25<sup>low</sup>CD127<sup>low</sup> CD4<sup>+</sup> T cells could  
447 be due to the fact that a larger proportion of effector cells are present in this subset as  
448 compared with their CD25<sup>+</sup> counterparts. Overall the observation of suppression by  
449 CD25<sup>low</sup>CD127<sup>low</sup> CD4<sup>+</sup> T cells supports the conclusion that the CD25<sup>low</sup> HELIOS<sup>+</sup>FOXP3<sup>+</sup>  
450 Tregs present in the heterogeneous CD25<sup>low</sup>CD127<sup>low</sup> CD4<sup>+</sup> T cell population are

451 functionally suppressive. Future studies are needed to unravel the heterogeneity present in  
452 both the CD25<sup>low</sup> and CD25<sup>high</sup> CD127<sup>low</sup>CD4<sup>+</sup> T cell subsets.

453

454 In contrast to the reduced expression of several molecules that are abundant in FOXP3<sup>+</sup>  
455 Tregs, the frequency of cells expressing PD-1 and Ki-67 in CD25<sup>low</sup> Tregs was higher than in  
456 conventional CD25<sup>high</sup> Tregs, suggesting that the CD25<sup>low</sup> HELIOS<sup>+</sup>FOXP3<sup>+</sup> population may  
457 represent the consequences of CD25<sup>high</sup> Tregs attempting to suppress ongoing inflammatory  
458 responses in tissues. The progression of CD25<sup>high</sup> Tregs to the CD25<sup>low</sup> Treg subset is  
459 supported by our observation of the strong correlation between the frequency of CD25<sup>high</sup>  
460 Tregs in cell cycle (Ki-67<sup>+</sup>) with the number of CD25<sup>low</sup> Tregs. The high proportion (15-  
461 40%) of memory FOXP3<sup>+</sup> Tregs in cycle is consistent with their shorter half-lives as  
462 compared to other T cell subsets [20,21]. Thus, given the fact that Treg percentages normally  
463 remain constant in an individual through time [21], and a high proportion of the cells are  
464 replicating, Treg cell death must be a common outcome following cell division. We propose  
465 that the decreased expression of CD25 on Tregs, most likely caused by exposure to  
466 inflammatory conditions, causes less responsiveness to IL-2, reduced expression of FOXP3  
467 and other Treg-associated molecules, and an increased probability of cell death. Despite the  
468 reduced IL-2 responsiveness in CD25<sup>low</sup> Tregs, it is possible that the Tregs remain functional  
469 and that the upregulation of PD-1 could compensate for reductions in FOXP3 and CTLA-4  
470 levels [22]. Consistent with this hypothesis, previous studies have reported that PD-1 is a  
471 critical inhibitory molecule that is upregulated on T cells after activation [23–25]. In contrast,  
472 chronic PD-1 signaling within peripheral compartments has been reported to lead to reduced  
473 STAT5 phosphorylation, decreased expression of CD25, FOXP3 and CTLA-4, and decreased

474 Treg suppressive function [26–28]. Additional functional studies are required to resolve these

475 apparently contradictory mechanisms.

476

477 **5. Conclusions**

478 We hypothesize that the presence of a low frequency of CD25<sup>low</sup> HELIOS<sup>+</sup>FOXP3<sup>+</sup> cells in  
479 peripheral blood from healthy individuals reflects a normal physiological mechanism to  
480 maintain, genetically-regulated, Treg levels. Their increased frequency in peripheral blood  
481 from autoimmune patients, which is particularly noteworthy in patients with chronic systemic  
482 inflammation, is indicative of an inflammatory insult that drives the expansion of the Treg  
483 population, which can be transient or chronic, in an attempt to regulate an overt autoimmune  
484 Teff response. Given the paucity of reliable peripheral biomarkers of disease activity, our  
485 findings suggest that the frequency of CD25<sup>low</sup> HELIOS<sup>+</sup>FOXP3<sup>+</sup> Tregs could provide  
486 valuable information about recent or ongoing tissue inflammation and could have a clinical  
487 application for the stratification of patients with flaring autoimmunity.

488



489 **Author contributions**

490 R.C.F., J.A.T., L.S.W. and M.L.P. designed experiments and interpreted data. R.C.F.,  
491 H.Z.S., W.S.T., D.B.R., A.J.C., J.O., X.C.D., D.J.S., N.S., M.M. and M.L.P. performed  
492 experiments. X.Y. analysed the data. C.W. supervised the statistical analysis of the data.  
493 T.V., D.B.D., H.B and A.C. provided samples and clinical outcome data. R.C.F., J.A.T.,  
494 L.S.W. and M.L.P. conceived the study and wrote the paper.

495

## 496 **Acknowledgements**

497 This work was supported by the JDRF UK Centre for Diabetes - Genes, Autoimmunity and  
498 Prevention (D-GAP; 4-2007-1003) in collaboration with M. Peakman and T. Tree at Kings  
499 College London, the JDRF, the Wellcome Trust (WT; WT061858/091157) and the National  
500 Institute for Health Research Cambridge Biomedical Research Centre. RCF is funded by an  
501 advanced JDRF post-doctoral fellowship (3-APF-2015-88-A-N). CW is funded by the  
502 Wellcome Trust (088998).

503

504 We thank staff of the National Institute for Health Research (NIHR) Cambridge BioResource  
505 recruitment team for assistance with volunteer recruitment and K. Beer, T. Cook, S. Hall and  
506 J. Rice of the Cambridge BioResource for blood sample collection. We thank C. Guy from  
507 the Department of Paediatrics, School of Clinical Medicine, University of Cambridge for D-  
508 GAP sample recruitment. We thank M. Woodburn and T. Attwood from the Cambridge  
509 Institute for Medical Research, University of Cambridge for their contribution to sample  
510 management and N. Walker and H. Schuilenburg from the Cambridge Institute for Medical  
511 Research, University of Cambridge for data management. This research was supported by  
512 the Cambridge NIHR BRC Cell Phenotyping Hub. In particular, we wish to thank Anna  
513 Petrunkina Harrison, Simon McCullum, Christopher Bowman and Esther Perez from the  
514 Cambridge NIHR BRC Cell Phenotyping Hub for their advice and support in cell sorting.  
515 We thank Howard Martin, Fay Rodger and Ruth Littleboy for running the Illumina MiSeq in  
516 the Molecular Genetics Laboratories, Addenbrooke's Hospital, Cambridge. We thank  
517 members of the NIHR Cambridge BioResource SAB and management committee for their  
518 support and the NIHR Cambridge Biomedical Research Centre for funding. Access to NIHR  
519 Cambridge BioResource volunteers and their data and samples is governed by the NIHR  
520 Cambridge BioResource SAB. Documents describing access arrangements and contact  
521 details are available at <http://www.cambridgebioresource.org.uk/>. We also thank H. Stevens,  
522 P. Clarke, G. Coleman, S. Dawson, S. Duley, M. Maisuria-Armer and T. Mistry from the  
523 Cambridge Institute for Medical Research, University of Cambridge for preparation of  
524 PBMC samples.

## 525 **References**

526

- 527 [1] N. Ohkura, M. Hamaguchi, H. Morikawa, K. Sugimura, A. Tanaka, Y. Ito, M. Osaki,  
528 Y. Tanaka, R. Yamashita, N. Nakano, J. Huehn, H.J. Fehling, T. Sparwasser, K.  
529 Nakai, S. Sakaguchi, T Cell Receptor Stimulation-Induced Epigenetic Changes and  
530 Foxp3 Expression Are Independent and Complementary Events Required for Treg  
531 Cell Development, *Immunity*. 37 (2012) 785–799.
- 532 [2] M. Miyara, Y. Yoshioka, A. Kitoh, T. Shima, K. Wing, A. Niwa, C. Parizot, C. Taflin,  
533 T. Heike, D. Valeyre, A. Mathian, T. Nakahata, T. Yamaguchi, T. Nomura, M. Ono, Z.  
534 Amoura, G. Gorochoy, S. Sakaguchi, Functional Delineation and Differentiation  
535 Dynamics of Human CD4+ T Cells Expressing the FoxP3 Transcription Factor,  
536 *Immunity*. 30 (2009) 899–911.
- 537 [3] K. Bin Dhuban, E. D’Hennezel, E. Nashi, A. Bar-Or, S. Rieder, E.M. Shevach, S.  
538 Nagata, C.A. Piccirillo, Coexpression of TIGIT and FCRL3 Identifies Helios+ Human  
539 Memory Regulatory T Cells, *J. Immunol*. 194 (2015) 3687–3696.
- 540 [4] C.A. Fuhrman, W.-I. Yeh, H.R. Seay, P. Saikumar Lakshmi, G. Chopra, L. Zhang,  
541 D.J. Perry, S.A. McClymont, M. Yadav, M.-C. Lopez, H. V Baker, Y. Zhang, Y. Li,  
542 M. Whitley, D. von Schack, M.A. Atkinson, J.A. Bluestone, T.M. Brusko, Divergent  
543 Phenotypes of Human Regulatory T Cells Expressing the Receptors TIGIT and  
544 CD226, *J. Immunol*. 195 (2015) 145–155.
- 545 [5] B. Zhang, X. Zhang, F.L. Tang, L.P. Zhu, Y. Liu, P.E. Lipsky, Clinical significance of  
546 increased CD4+CD25–Foxp3+ T cells in patients with new-onset systemic lupus  
547 erythematosus, *Ann. Rheum. Dis*. 67 (2008) 1037–1040.
- 548 [6] R.K. Chowdary Venigalla, T. Tretter, S. Krienke, R. Max, V. Eckstein, N. Blank, C.  
549 Fiehn, A. Dick Ho, H.-M. Lorenz, Reduced CD4+,CD25– T cell sensitivity to the  
550 suppressive function of CD4+,CD25high,CD127–/low regulatory T cells in patients  
551 with active systemic lupus erythematosus, *Arthritis Rheum*. 58 (2008) 2120–2130.
- 552 [7] M. Bonelli, A. Savitskaya, C.-W. Steiner, E. Rath, J.S. Smolen, C. Scheinecker,  
553 Phenotypic and Functional Analysis of CD4+CD25–Foxp3+ T Cells in Patients with  
554 Systemic Lupus Erythematosus, *J. Immunol*. 182 (2009) 1689–1695.
- 555 [8] H. Yang, W. Zhang, L. Zhao, Y. Li, F. Zhang, F. Tang, W. He, X. Zhang, Are  
556 CD4+CD25–Foxp3+ cells in untreated new-onset lupus patients regulatory T cells?,

- 557 Arthritis Res. Ther. 11 (2009) 1–9.
- 558 [9] J.-L. Suen, H.-T. Li, Y.-J. Jong, B.-L. Chiang, J.-H. Yen, Altered homeostasis of  
559 CD4+ FoxP3+ regulatory T-cell subpopulations in systemic lupus erythematosus,  
560 Immunology. 127 (2009) 196–205.
- 561 [10] M. Fransson, J. Burman, C. Lindqvist, C. Atterby, J. Fagius, A. Loskog, T regulatory  
562 cells lacking CD25 are increased in MS during relapse, Autoimmunity. 43 (2010) 590–  
563 597.
- 564 [11] B. de Paz, C. Prado, M. Alperi-López, F.J. Ballina-García, J. Rodríguez-Carrio, P.  
565 López, A. Suárez, Effects of glucocorticoid treatment on CD25–FOXP3+ population  
566 and cytokine-producing cells in rheumatoid arthritis, Rheumatology. 51 (2012) 1198–  
567 1207.
- 568 [12] D.A. Horwitz, Identity of mysterious CD4+CD25-Foxp3+ cells in SLE, Arthritis Res.  
569 Ther. 12 (2010) 101.
- 570 [13] W. Liu, A.L. Putnam, Z. Xu-yu, G.L. Szot, M.R. Lee, S. Zhu, P.A. Gottlieb, P.  
571 Kapranov, T.R. Gingeras, B.F. de St. Groth, C. Clayberger, D.M. Soper, S.F. Ziegler,  
572 J.A. Bluestone, CD127 expression inversely correlates with FoxP3 and suppressive  
573 function of human CD4+ T reg cells, J. Exp. Med. 203 (2006) 1701-1711.
- 574 [14] H.S. Kuehn, W. Ouyang, B. Lo, E.K. Deenick, J.E. Niemela, D.T. Avery, J.-N.  
575 Schickel, D.Q. Tran, J. Stoddard, Y. Zhang, D.M. Frucht, B. Dumitriu, P. Scheinberg,  
576 L.R. Folio, C.A. Frein, S. Price, C. Koh, T. Heller, C.M. Seroogy, A. Huttenlocher,  
577 V.K. Rao, H.C. Su, D. Kleiner, L.D. Notarangelo, Y. Rampertaap, K.N. Olivier, J.  
578 McElwee, J. Hughes, S. Pittaluga, J.B. Oliveira, E. Meffre, T.A. Fleisher, S.M.  
579 Holland, M.J. Lenardo, S.G. Tangye, G. Uzel, Immune dysregulation in human  
580 subjects with heterozygous germline mutations in CTLA4, Science (80). 345 (2014)  
581 1623–1627.
- 582 [15] W.S. Thompson, M.L. Pekalski, H.Z. Simons, D.J. Smyth, X. Castro-Dopico, H. Guo,  
583 C. Guy, D.B. Dunger, S. Arif, M. Peakman, C. Wallace, L.S. Wicker, J.A. Todd, R.C.  
584 Ferreira, Multi-parametric flow cytometric and genetic investigation of the peripheral  
585 B cell compartment in human type 1 diabetes, Clin. Exp. Immunol. 177 (2014) 571–  
586 585.
- 587 [16] D.B. Rainbow, X. Yang, O. Burren, M.L. Pekalski, D.J. Smyth, M.D.R. Klarqvist, C.J.  
588 Penkett, K. Brugger, H. Martin, J.A. Todd, C. Wallace, L.S. Wicker, Epigenetic

- 589 analysis of regulatory T cells using multiplex bisulfite sequencing, *Eur. J. Immunol.* 45  
590 (2015) 3200–3203.
- 591 [17] S.A. McClymont, A.L. Putnam, M.R. Lee, J.H. Esensten, W. Liu, M.A. Hulme, U.  
592 Hoffmüller, U. Baron, S. Olek, J.A. Bluestone, T.M. Brusko, Plasticity of Human  
593 Regulatory T Cells in Healthy Subjects and Patients with Type 1 Diabetes, *J.*  
594 *Immunol.* 186 (2011) 3918–3926.
- 595 [18] A. Zóka, G. Barna, A. Somogyi, G. Múzes, Á. Oláh, Z. Al-Aissa, O. Hadarits, K. Kiss,  
596 G. Firneisz, Extension of the CD4+Foxp3+CD25–/low regulatory T-cell  
597 subpopulation in type 1 diabetes mellitus, *Autoimmunity.* 48 (2015) 289–297.
- 598 [19] D. Bending, A.M. Pesenacker, S. Ursu, Q. Wu, H. Lom, B. Thirugnanabalan, L.R.  
599 Wedderburn, Hypomethylation at the Regulatory T Cell–Specific Demethylated  
600 Region in CD25hi T Cells Is Decoupled from FOXP3 Expression at the Inflamed Site  
601 in Childhood Arthritis, *J. Immunol.* 193 (2014) 2699–2708.
- 602 [20] M. Vukmanovic-Stejic, Y. Zhang, J.E. Cook, J.M. Fletcher, A. McQuaid, J.E. Masters,  
603 M.H.A. Rustin, L.S. Taams, P.C.L. Beverley, D.C. Macallan, A.N. Akbar, Human  
604 CD4+ CD25hi Foxp3+ regulatory T cells are derived by rapid turnover of memory  
605 populations in vivo , *J. Clin. Invest.* 116 (2006) 2423–2433.
- 606 [21] J.B. Bollyky, S.A. Long, M. Fitch, P.L. Bollyky, M. Rieck, R. Rogers, P.L. Samuels,  
607 S. Sanda, J.H. Buckner, M.K. Hellerstein, C.J. Greenbaum, Evaluation of in vivo T  
608 cell kinetics: use of heavy isotope labelling in type 1 diabetes, *Clin. Exp. Immunol.*  
609 172 (2013) 363–374.
- 610 [22] T. Asano, Y. Meguri, T. Yoshioka, Y. Kishi, M. Iwamoto, M. Nakamura, Y. Sando, H.  
611 Yagita, J. Koreth, H.T. Kim, E.P. Alyea, P. Armand, C.S. Cutler, V.T. Ho, J.H. Antin,  
612 R.J. Soiffer, Y. Maeda, M. Tanimoto, J. Ritz, K. Matsuoka, PD-1 modulates regulatory  
613 T cell homeostasis during low-dose IL-2 therapy, *Blood.* 129 (2017) 2186-2197.
- 614 [23] A.H. Sharpe, E.J. Wherry, R. Ahmed, G.J. Freeman, The function of programmed cell  
615 death 1 and its ligands in regulating autoimmunity and infection, *Nat Immunol.* 8  
616 (2007) 239–245.
- 617 [24] B.T. Fife, J.A. Bluestone, Control of peripheral T-cell tolerance and autoimmunity via  
618 the CTLA-4 and PD-1 pathways, *Immunol. Rev.* 224 (2008) 166–182.
- 619 [25] L.M. Francisco, P.T. Sage, A.H. Sharpe, The PD-1 pathway in tolerance and  
620 autoimmunity, *Immunol. Rev.* 236 (2010) 219–242.

- 621 [26] D. Franceschini, M. Paroli, V. Francavilla, M. Videtta, S. Morrone, G. Labbadia, A.  
622 Cerino, M.U. Mondelli, V. Barnaba, PD-L1 negatively regulates CD4+CD25+Foxp3+  
623 Tregs by limiting STAT-5 phosphorylation in patients chronically infected with HCV ,  
624 J. Clin. Invest. 119 (2009) 551–564.
- 625 [27] P.T. Sage, L.M. Francisco, C. V Carman, A.H. Sharpe, The receptor PD-1 controls  
626 follicular regulatory T cells in the lymph nodes and blood, Nat Immunol. 14 (2013)  
627 152–161.
- 628 [28] M. Wong, A. La Cava, B.H. Hahn, Blockade of Programmed Death-1 in Young (New  
629 Zealand Black × New Zealand White)F1 Mice Promotes the Suppressive Capacity of  
630 CD4+ Regulatory T Cells Protecting from Lupus-like Disease, J. Immunol. 190 (2013)  
631 5402–5410.  
632

## 633 **Figure legends**

634

635 **Fig. 1. Frequency of CD25<sup>low</sup>FOXP3<sup>+</sup> cells is increased in patients with autoimmune**  
636 **disease. (A)** Patterns of CD25 and FOXP3 expression among CD127<sup>low</sup> CD4<sup>+</sup> T cells from  
637 healthy donors and patients with autoimmune manifestations. **(B)** Gating strategy for the  
638 delineation of the T-cell subsets characterised in this study. Distribution of FOXP3<sup>+</sup> cells  
639 among: (i) CD127<sup>low</sup>CD25<sup>high</sup> conventional Tregs (depicted in blue); and (ii)  
640 CD127<sup>low</sup>CD25<sup>low</sup> T cells (depicted in red). The vertical dotted line represents the threshold  
641 for the gating of FOXP3<sup>+</sup> cells (histograms). **(C, D)** Scatter plots depict the frequency  
642 (geometric mean +/- 95% CI) of FOXP3<sup>+</sup> cells among CD127<sup>low</sup>CD25<sup>low</sup> T cells in SLE  
643 patients (N = 32 patients vs 24 healthy donors) and combined immunodeficiency patients  
644 with active autoimmunity (N = 7 patients vs 6 healthy donors) **(C)**; or in a cohort of T1D  
645 patients (N = 62; depicted by red circles) and healthy donors (N = 54; depicted by black  
646 squares) **(D)**. *P* values were calculated using two-tailed unpaired t-tests. The initial CD4<sup>+</sup> T  
647 cell gate (CD4 versus dead cell exclusion dye) was derived from a lymphocyte gate (defined  
648 on forward and side scatter) followed by single-cell discrimination. HC, healthy controls;  
649 T1D, type 1 diabetes patients; SLE, systemic lupus erythematosus patients; CID, combined  
650 immunodeficiency patients.

651

652 **Fig. 2. CD25<sup>low</sup>FOXP3<sup>+</sup> cells are demethylated at the *FOXP3* Treg-specific**  
653 **demethylated region (TSDR). (A)** Gating strategy for FACS sorting of four CD4<sup>+</sup> T-cell  
654 subsets: (i) CD127<sup>low</sup>CD25<sup>low</sup>FOXP3<sup>-</sup> (depicted in green), (ii) CD127<sup>low</sup>CD25<sup>low</sup>FOXP3<sup>+</sup>  
655 (depicted in red), (iii) CD127<sup>low</sup>CD25<sup>high</sup>FOXP3<sup>-</sup> (depicted in grey), and (iv)  
656 CD127<sup>low</sup>CD25<sup>high</sup>FOXP3<sup>+</sup> (depicted in blue). **(B)** Frequency (mean +/- SEM) of reads  
657 demethylated at eight or nine of the nine interrogated CpG sites in the *FOXP3* TSDR. The  
658 data were obtained from sorted cells from four independent healthy donors. **(C)** Graphic  
659 depicts the proportion of demethylated reads at the nine interrogated CpG sites from the  
660 *FOXP3* TSDR in one illustrative donor. Each horizontal line represents one sequencing read,  
661 with light green representing a methylated read (C) and dark green representing a  
662 demethylated read (T). Note that the plot is representative of a male donor. For female  
663 donors, X-chromosome inactivation causes half of the reads to be methylated and a  
664 correction factor of two was applied to obtain the frequency of demethylated reads.

665

666 **Fig. 3. CD25<sup>low</sup>FOXP3<sup>+</sup> T cells display an antigen-experienced phenotype. (A, B)**

667 Representative histograms and summary scatter plots depict the frequency (geometric mean  
668 +/- 95% CI) of CD45RA<sup>-</sup> memory T cells amongst the CD25<sup>low</sup>FOXP3<sup>-</sup> and  
669 CD25<sup>low</sup>FOXP3<sup>+</sup> subsets in a population of 24 adult (median age = 42 years) healthy donors  
670 (A) or in a population of 116 younger (median age = 14 years) T1D patients (N = 62) and  
671 healthy donors (N = 54) (B). (C, D) Representative histograms and the frequency distribution  
672 (geometric mean +/- 95% CI) of Ki-67<sup>+</sup> (C) and PD-1<sup>+</sup> (D) cells in the CD45RA<sup>-</sup>  
673 compartment of the four assessed immune subsets. *P* values were calculated using two-tailed  
674 paired t-tests comparing the frequency of the assessed immune subsets from the same  
675 individual. Gating strategy to delineate: (i) CD127<sup>low</sup>CD25<sup>low</sup>FOXP3<sup>-</sup> (highlighted in green),  
676 (ii) CD127<sup>low</sup>CD25<sup>low</sup>FOXP3<sup>+</sup> (highlighted in red), (iii) CD127<sup>low</sup>CD25<sup>high</sup>FOXP3<sup>-</sup>  
677 (highlighted in grey), and (iv) CD127<sup>low</sup>CD25<sup>high</sup>FOXP3<sup>+</sup> (highlighted in blue) CD4<sup>+</sup> T cells  
678 is depicted in Figure 2A.

679

680 **Fig. 4. CD25<sup>low</sup>FOXP3<sup>+</sup> cells show reduced expression of several conventional Treg**

681 **markers. (A)** Representative histograms depict the distribution of the expression of the  
682 conventional Treg markers HELIOS, TIGIT, CD15s and CTLA-4 amongst: (i)  
683 CD127<sup>low</sup>CD25<sup>low</sup>FOXP3<sup>-</sup> (highlighted in green), (ii) CD127<sup>low</sup>CD25<sup>low</sup>FOXP3<sup>+</sup> (highlighted  
684 in red), (iii) CD127<sup>low</sup>CD25<sup>high</sup>FOXP3<sup>-</sup> (highlighted in grey), and (iv)  
685 CD127<sup>low</sup>CD25<sup>high</sup>FOXP3<sup>+</sup> (highlighted in blue) memory CD4<sup>+</sup> T cells. (B) Scatter plots  
686 depict the distribution (geometric mean +/- 95% CI) of HELIOS (n = 24), TIGIT (n = 24),  
687 CD15s (n = 24) and CTLA-4 (n = 13) in the CD45RA<sup>-</sup> compartment of the four assessed  
688 immune subsets. (C) Expression of FOXP3 (geometric mean +/- 95% CI) was measured in  
689 the CD25<sup>low</sup>FOXP3<sup>+</sup> (depicted by red squares) and CD25<sup>high</sup>FOXP3<sup>+</sup> (depicted by blue  
690 circles) subsets from 24 healthy donors. *P* values were calculated using two-tailed paired t-  
691 tests comparing the assessed immunophenotypes between CD25<sup>low</sup>FOXP3<sup>-</sup> and the other  
692 three delineated subsets from the same individual. MFI, mean fluorescence intensity.

693

694 **Fig. 5. HELIOS<sup>+</sup>CD45RA<sup>-</sup> CD25<sup>low</sup>FOXP3<sup>+</sup> cells are demethylated at TSDR as much as**

695 **conventional HELIOS<sup>+</sup>CD45RA<sup>-</sup> CD25<sup>high</sup>FOXP3<sup>+</sup> Tregs.** Frequency (mean +/- SEM) of  
696 reads demethylated at eight or nine of the nine interrogated CpG sites in the *FOXP3* TSDR in



697 CD45RA<sup>-</sup> CD25<sup>low</sup>FOXP3<sup>+</sup> cells and CD45RA<sup>-</sup> CD25<sup>high</sup>FOXP3<sup>+</sup> Tregs stratified by the  
698 expression of HELIOS. The data were obtained from sorted cells from three independent  
699 healthy donors.

700

701 **Fig. 6. HELIOS<sup>+</sup>CD45RA<sup>-</sup> CD25<sup>low</sup>FOXP3<sup>+</sup> cells show impaired production of IL-2**

702 **and IFN- $\gamma$ .** (A) Gating strategy to delineate the CD45RA<sup>-</sup>HELIOS<sup>+</sup> subset of: (i)

703 CD127<sup>low</sup>CD25<sup>low</sup>FOXP3<sup>+</sup> (highlighted in red), (ii) CD127<sup>low</sup>CD25<sup>high</sup>FOXP3<sup>+</sup> (highlighted

704 in blue), and (iii) CD127<sup>+</sup>CD25<sup>low/+</sup>FOXP3<sup>-</sup> HELIOS<sup>-</sup> conventional (Conv) effector

705 (highlighted in black) subsets of CD4<sup>+</sup> T cells. (B, C) Bar graphs depict the frequency (mean

706 +/- 95% CI) of IL-2<sup>+</sup> and IFN- $\gamma$ <sup>+</sup> cells in the CD45RA<sup>-</sup>HELIOS<sup>+</sup> compartment (or the

707 CD45RA<sup>-</sup>HELIOS<sup>-</sup> compartment in the case of the conventional effector T cells) of the five

708 assessed immune subsets depicted in panel A. Cytokine production was assessed in one

709 single batch of ten donors. *P* values were calculated using two-tailed paired t-tests. FACS

710 gating plots depict data from one illustrative donor. \*\* *P* < 0.01, \*\*\* *P* < 0.001.

711

712 **Fig. Proliferating Ki-67<sup>+</sup> CD127<sup>low</sup>CD25<sup>high</sup> Tregs correlate with the frequencies of the**

713 **CD127<sup>low</sup>CD25<sup>low</sup> and CD127<sup>low</sup>CD25<sup>high</sup> HELIOS<sup>+</sup>FOXP3<sup>+</sup> subsets.** (A, B) Data shown

714 depict the correlation between the frequency within CD45RA<sup>-</sup> CD4<sup>+</sup> T cells of in-cycle (Ki-

715 67<sup>+</sup>) CD4<sup>+</sup>CD45RA<sup>-</sup> CD127<sup>low</sup>CD25<sup>high</sup> Tregs (FOXP3<sup>+</sup>HELIOS<sup>+</sup>) and the frequency of

716 either CD25<sup>low</sup> FOXP3<sup>+</sup>HELIOS<sup>+</sup> T cells (A) or conventional CD25<sup>high</sup> FOXP3<sup>+</sup>HELIOS<sup>+</sup>

717 Tregs (B). (C) Data shown depict the correlation between the frequencies of circulating

718 CD4<sup>+</sup>CD45RA<sup>-</sup> CD25<sup>low</sup> FOXP3<sup>+</sup>HELIOS<sup>+</sup> and CD25<sup>high</sup> FOXP3<sup>+</sup>HELIOS<sup>+</sup> T cells.

719 Frequencies of the assessed immune subsets were measured in PBMCs from healthy

720 volunteers from two independent cohorts: cohort 1 containing 24 donors (depicted in red) and

721 cohort 2 containing 112 donors (depicted in black). The *r*<sup>2</sup> values represent the coefficient of

722 determination of the linear regression in the combined cohorts, and the *P* values correspond

723 to the F statistic testing the null hypothesis that the slope of the linear regression analysis is

724 equal to 0.

725

726 **Supplement**

727

728 **Supplementary Table 1. Antibodies and immunostaining panels used for flow**

729 **cytometry.** Detailed description of the fluorochrome-conjugated antibodies and  
730 immunostaining panels used in this study.

731

732 **Supplementary Fig. 1. Frequency of CD127<sup>low</sup>CD25<sup>low</sup>FOXP3<sup>+</sup> T cells is increased in**

733 **T1D patients.** (A) Scatter plot depicts the total frequency (geometric mean +/- 95% CI) of  
734 CD25<sup>low</sup>FOXP3<sup>+</sup> cells out of CD4<sup>+</sup> T cells in our discovery cohort of 62 T1D patients  
735 (depicted by red circles) and 54 healthy controls (depicted by black squares) (B) Scatter plots  
736 depict the frequency (geometric mean +/- 95% CI) of FOXP3<sup>+</sup> cells from CD127<sup>low</sup>CD25<sup>low</sup>  
737 T cells in: (i) an independent replication cohort consisting of 15 T1D patients and 15 healthy  
738 controls. *P* values were calculated using two-tailed unpaired t-tests comparing the geometric  
739 mean of the assessed immune subsets between T1D patients and healthy controls (HC).

740

741 **Supplementary Fig. 2. Minimal increase in the frequency of CD127<sup>low</sup>CD25<sup>high</sup>FOXP3<sup>+</sup>**

742 **T cells in T1D patients.** Scatter plot depicts the total frequency (geometric mean +/- 95%  
743 CI) of CD25<sup>high</sup>FOXP3<sup>+</sup> cells (classical Tregs) out of CD4<sup>+</sup> T cells in our discovery cohort of  
744 62 T1D patients (depicted by red circles) and 54 healthy controls (depicted by black squares).  
745 *P* values were calculated using two-tailed unpaired t-tests comparing the geometric mean of  
746 CD25<sup>high</sup>FOXP3<sup>+</sup> Tregs between T1D patients and healthy controls (HC).

747

748 **Supplementary Fig. 3. HELIOS expression defines distinct FOXP3<sup>+</sup> subsets.** Scatter

749 plots depict the distribution (geometric mean +/- 95% CI) of TIGIT (n = 24), CD15s (n = 24),  
750 CD45RA (n = 24), CTLA-4 (both frequency and MFI of the positive fraction; n = 13) and  
751 FOXP3 MFI (n = 24) in the HELIOS<sup>+</sup> and HELIOS<sup>-</sup> fractions of the (i) CD25<sup>low</sup>FOXP3<sup>+</sup> T  
752 cells (depicted in red) and (ii) conventional CD25<sup>low</sup>FOXP3<sup>+</sup> Tregs (depicted in blue). *P*  
753 values were calculated using two-tailed paired t-tests.

754

755 **Supplementary Fig. 4. The frequency of HELIOS<sup>+</sup>CD25<sup>low</sup>FOXP3<sup>+</sup> cells is increased in**

756 **patients with autoimmune disease.** (A, B) Scatter plots depict the distribution (geometric  
757 mean +/- 95% CI) of HELIOS<sup>+</sup>FOXP3<sup>+</sup> cells among CD127<sup>low</sup>CD25<sup>low</sup> T cells in SLE

758 patients (N = 32 patients vs 24 healthy donors) and combined immunodeficiency (CID)  
759 patients with active autoimmunity (N = 7 patients vs 6 healthy donors) (A); and in a cohort of  
760 T1D patients (N = 62; depicted by red circles) and healthy donors (N = 54; depicted by black  
761 squares) (B). (C, D) Scatter plots depict the distribution (geometric mean +/- 95% CI) of  
762 HELIOS<sup>+</sup> cells within CD25<sup>low</sup>FOXP3<sup>+</sup> T cells in the cohort of SLE and CID patients (C)  
763 and in the cohort of T1D patients (D). P values were calculated using two-tailed unpaired t-  
764 tests comparing the geometric mean of the assessed immune subsets between patients and the  
765 respective healthy control groups. .HC, healthy controls; T1D, type 1 diabetes patients; SLE,  
766 systemic lupus erythematosus patients; CID, combined immunodeficiency patients; ns = non-  
767 significant.

768

769 **Supplementary Fig. 5. Production of IFN- $\gamma$  from HELIOS<sup>-</sup>CD45RA<sup>-</sup>**

770 **CD127<sup>low</sup>CD25<sup>low</sup>FOXP3<sup>+</sup> T cells is not altered in T1D patients.** (A) Gating strategy  
771 illustrating the production of IFN- $\gamma$  in the HELIOS<sup>-</sup> and HELIOS<sup>+</sup> CD45RA<sup>-</sup> fractions of  
772 CD127<sup>low</sup>CD25<sup>low</sup>FOXP3<sup>+</sup> cells. FACS gating plot is a representative example. (B) Plot  
773 depicts the distribution of the frequency (geometric mean +/- 95% CI) of IFN- $\gamma$ <sup>+</sup> HELIOS<sup>-</sup> T  
774 cells in the CD45RA<sup>-</sup> CD127<sup>low</sup>CD25<sup>low</sup>FOXP3<sup>+</sup> population. Frequency of IFN- $\gamma$ <sup>+</sup> cells was  
775 compared between T1D patients (N = 62; depicted by red circles) and healthy donors (N =  
776 54; depicted by black squares) following *in vitro* stimulation with phorbol-12-myristate-13-  
777 acetate (PMA) and ionomycin. (C) Plot depicts the distribution of the frequency (geometric  
778 mean +/- 95% CI) of IFN- $\gamma$ <sup>+</sup> HELIOS<sup>-</sup> T cells in the CD45RA<sup>-</sup> CD127<sup>low</sup>CD25<sup>low</sup>FOXP3<sup>+</sup>  
779 population out of total CD4 T cells from the same donors as in (B). P values were calculated  
780 by linear regression of the log-transformed data, including batch as a covariate. HC, healthy  
781 controls; T1D, type 1 diabetic patients.

782

**Figure 1**

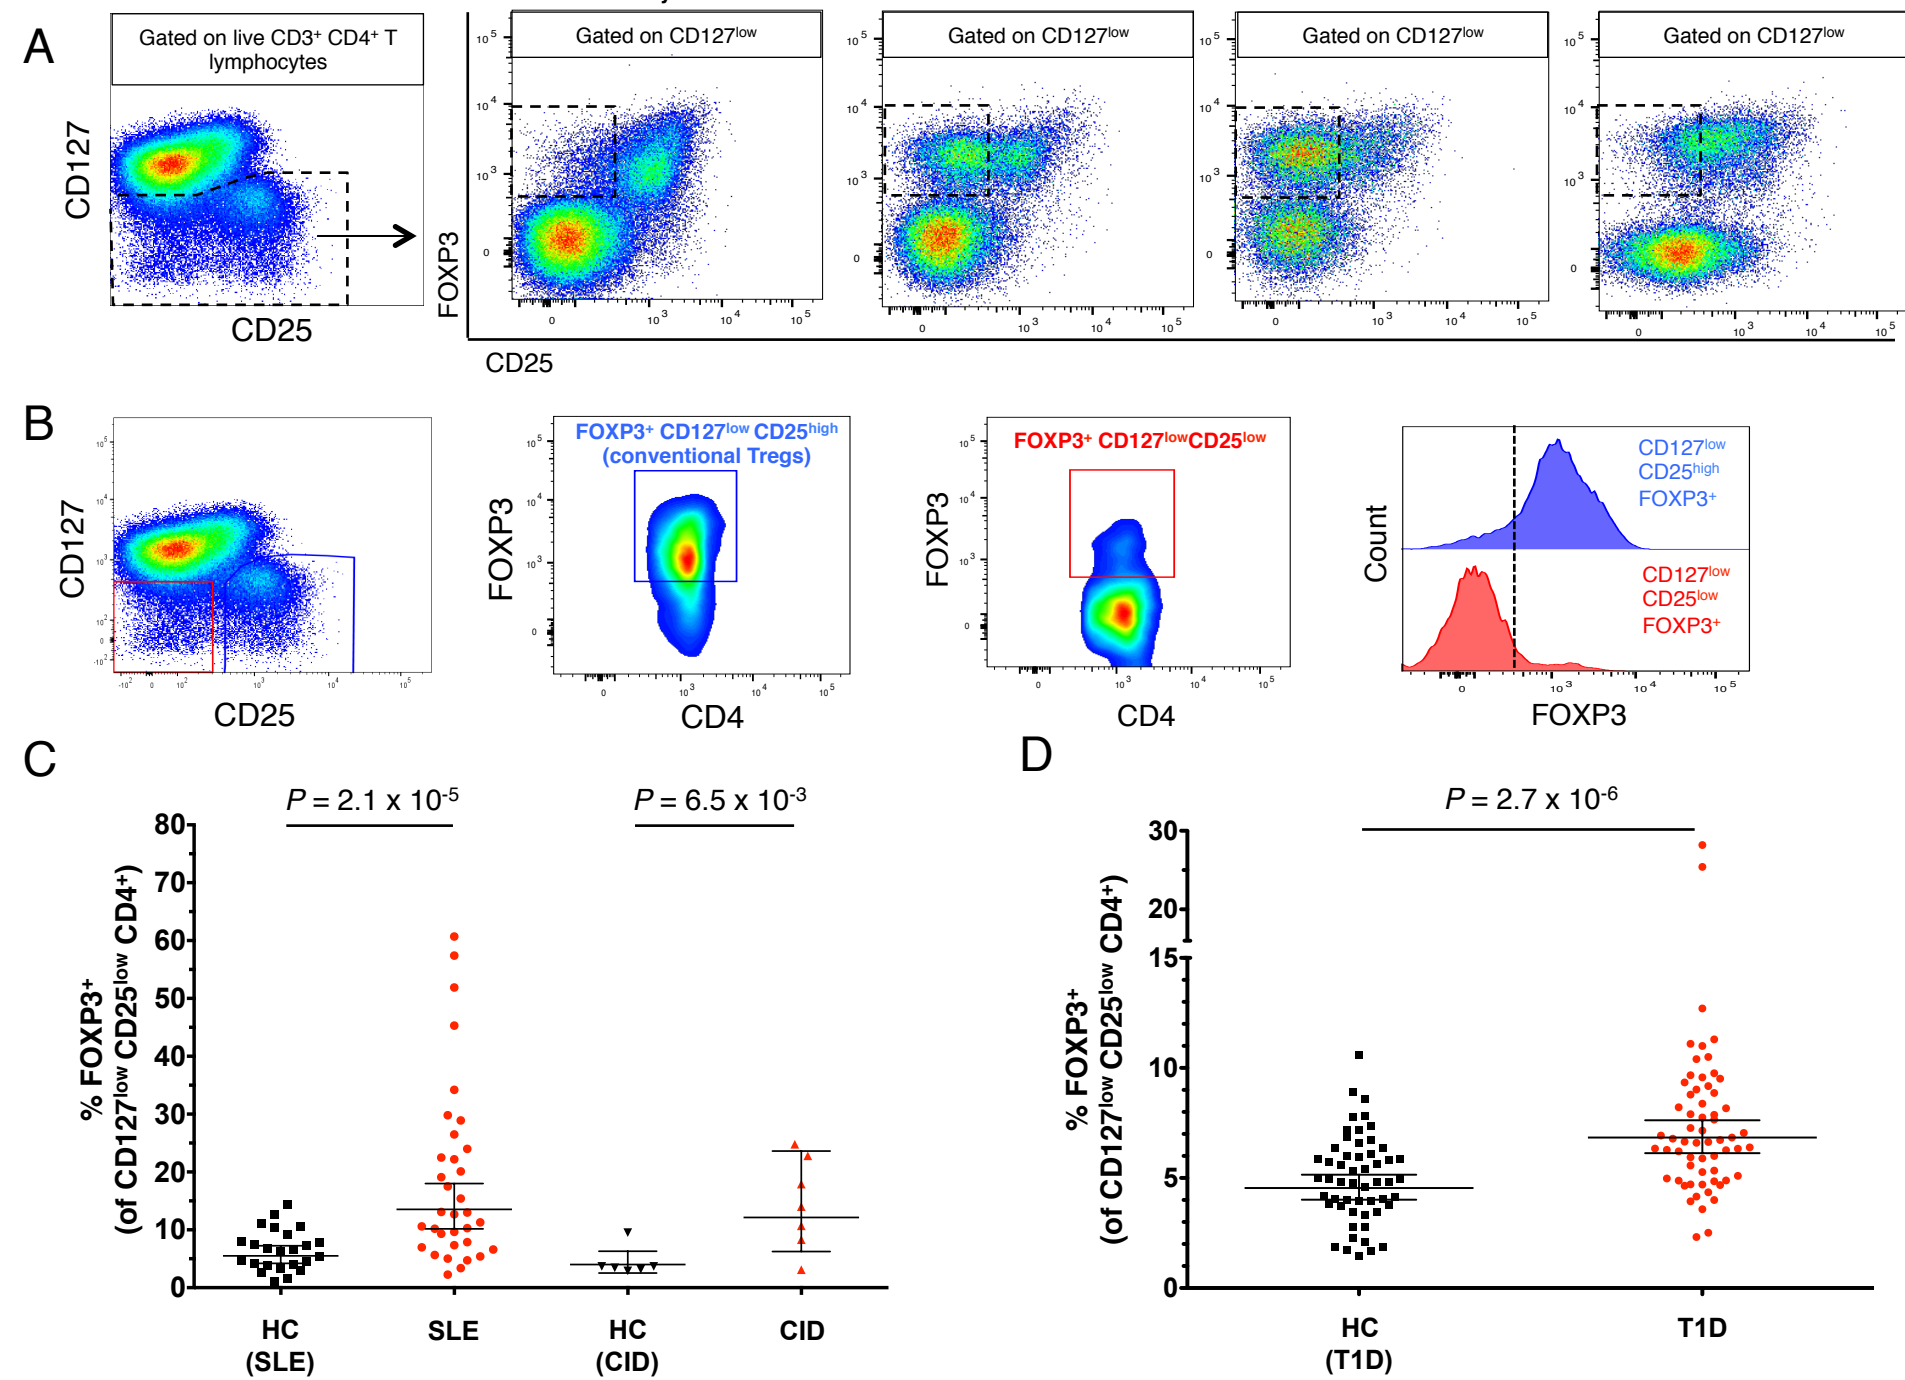

Figure 2

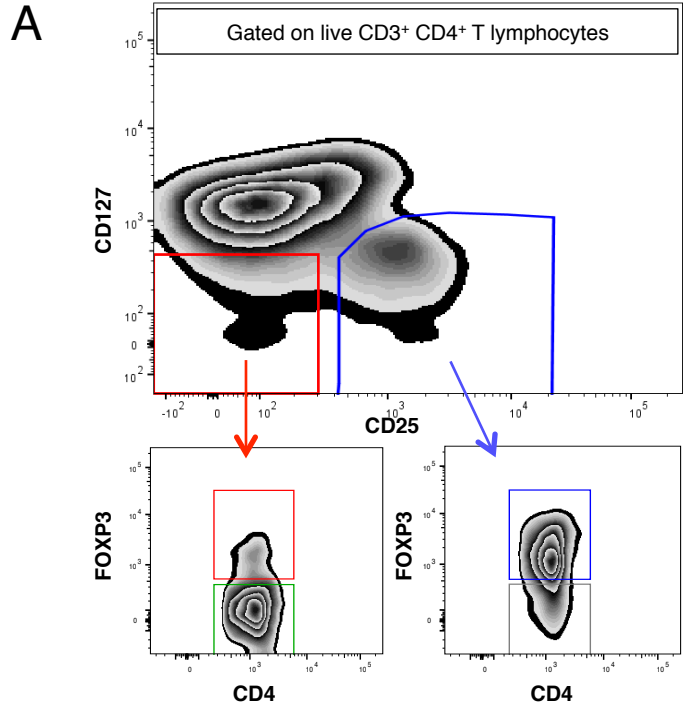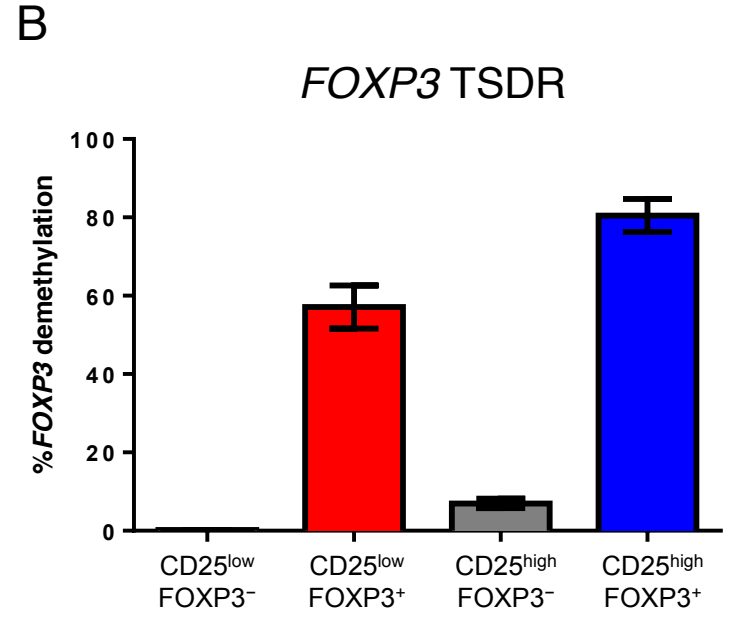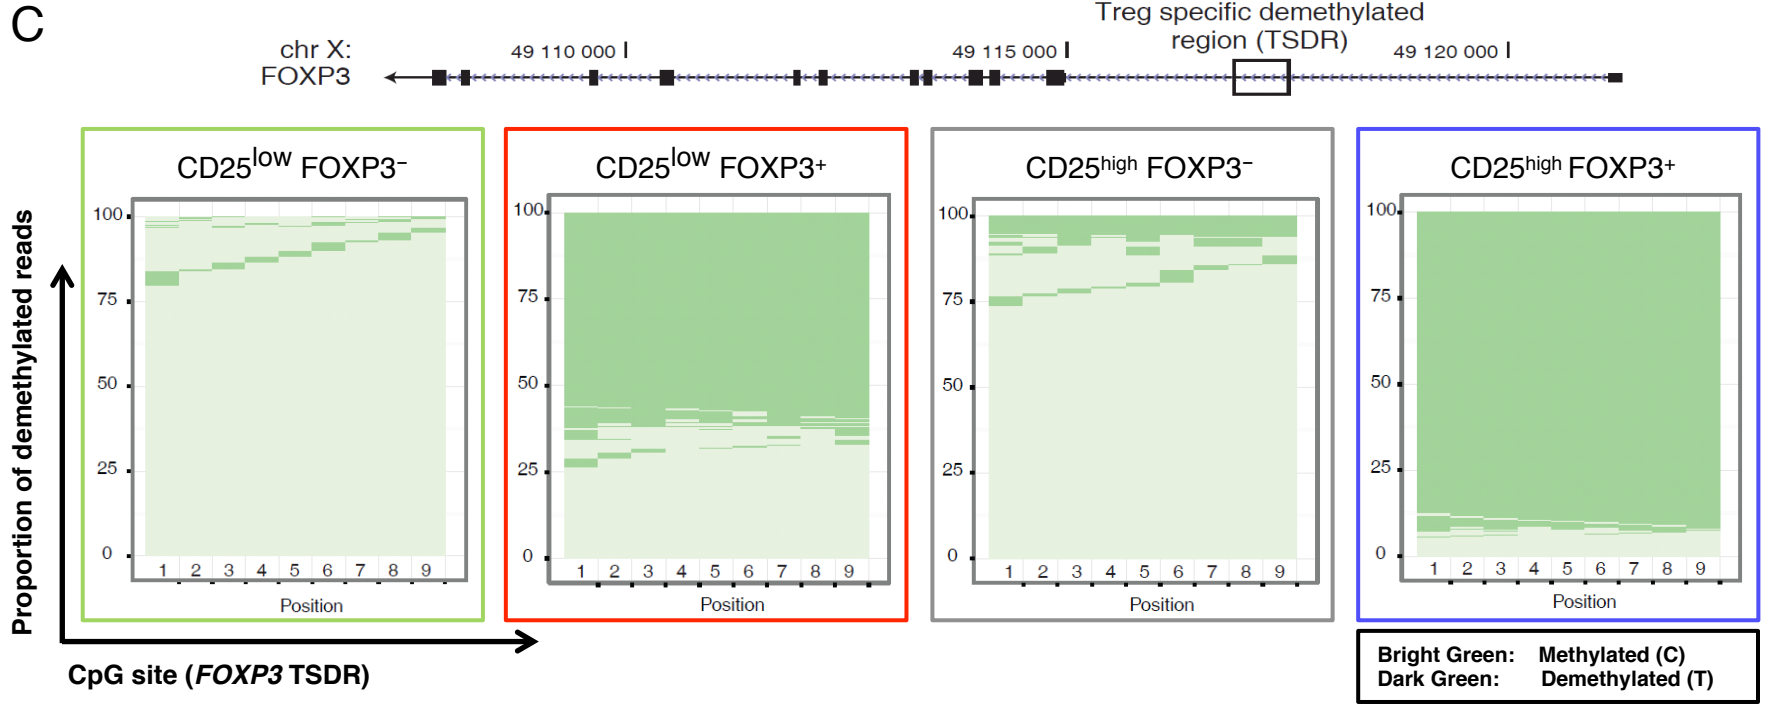

A

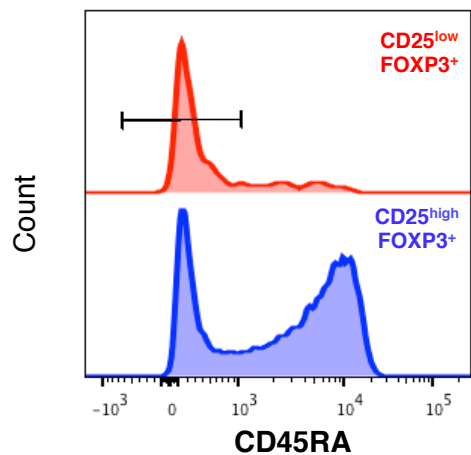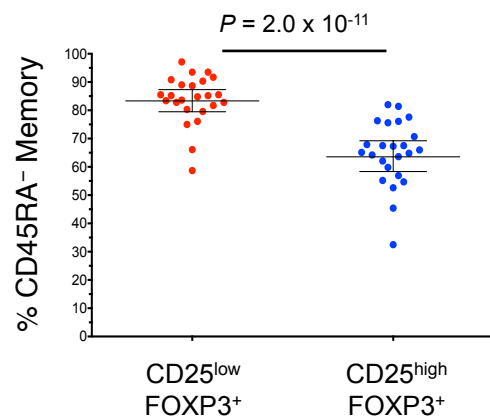

B

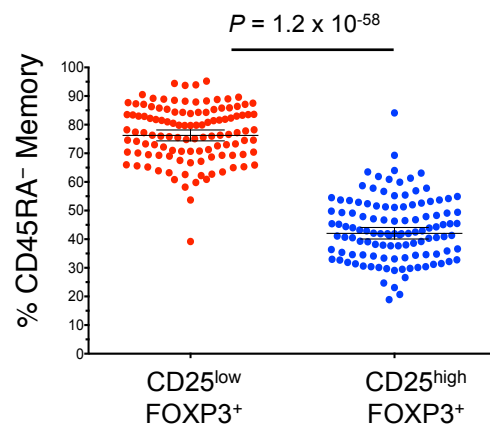

C

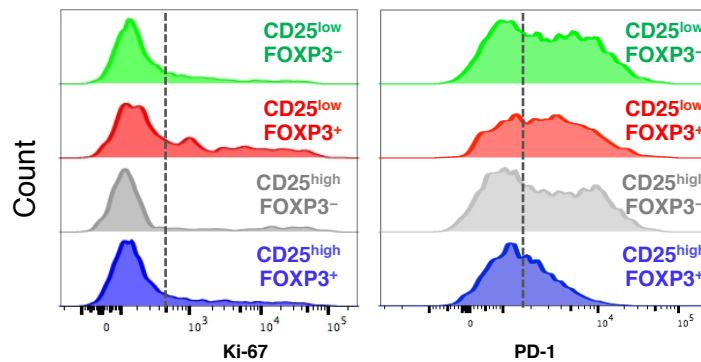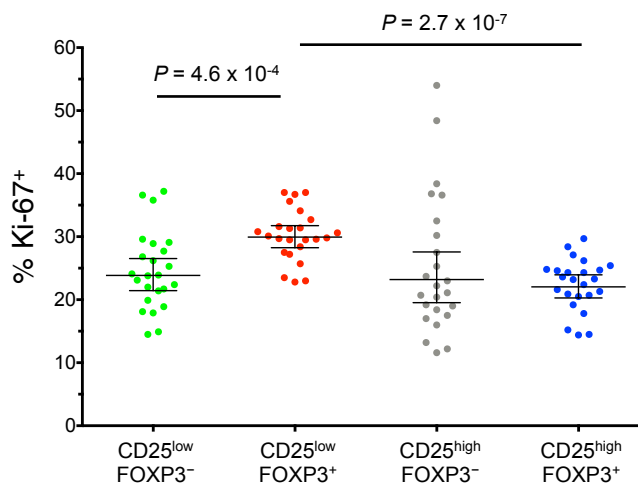

D

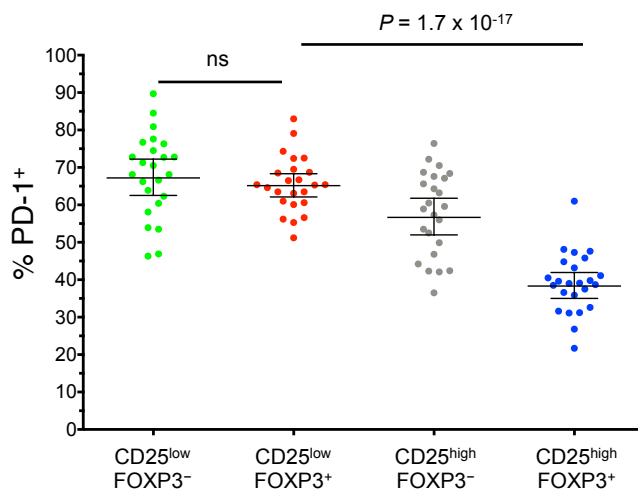

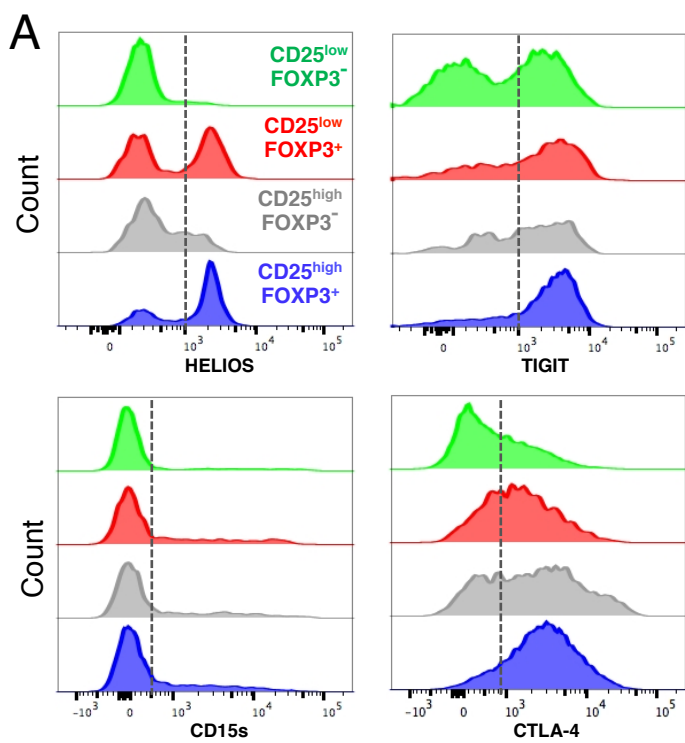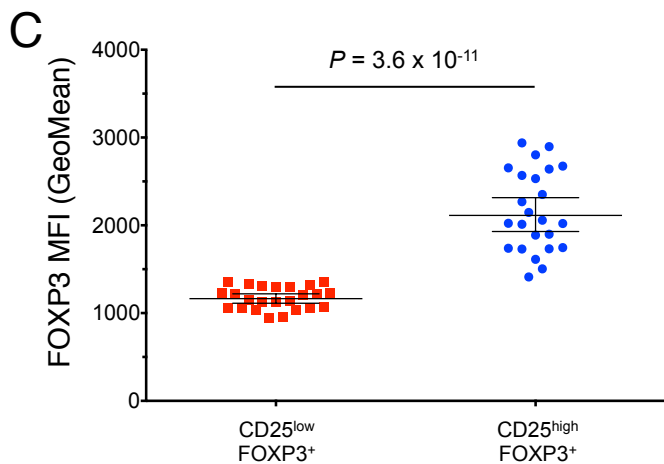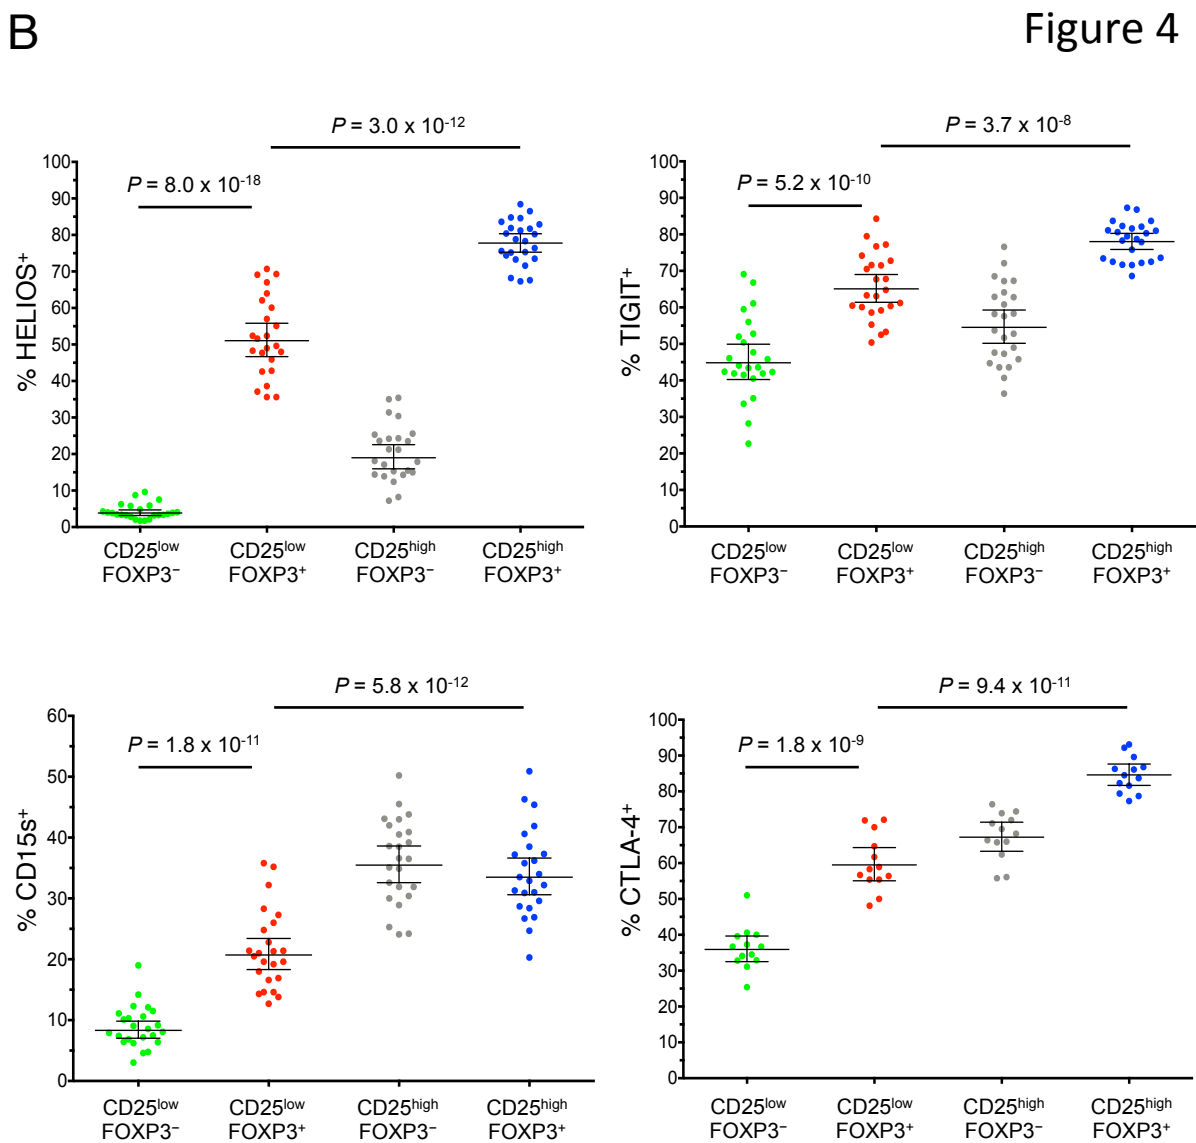

Figure 5

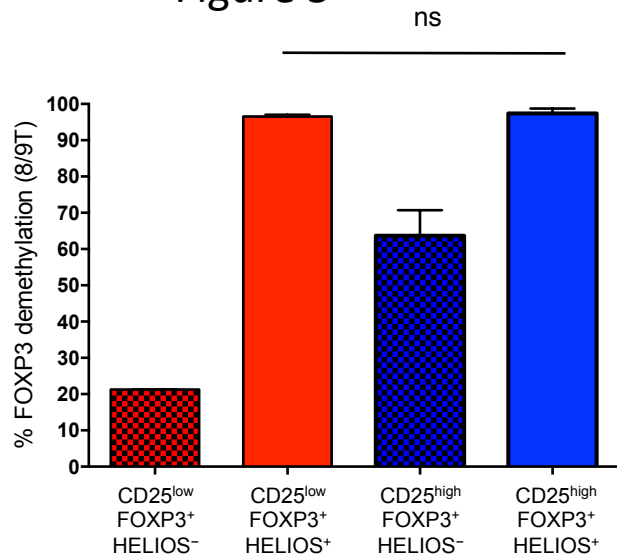

**B**

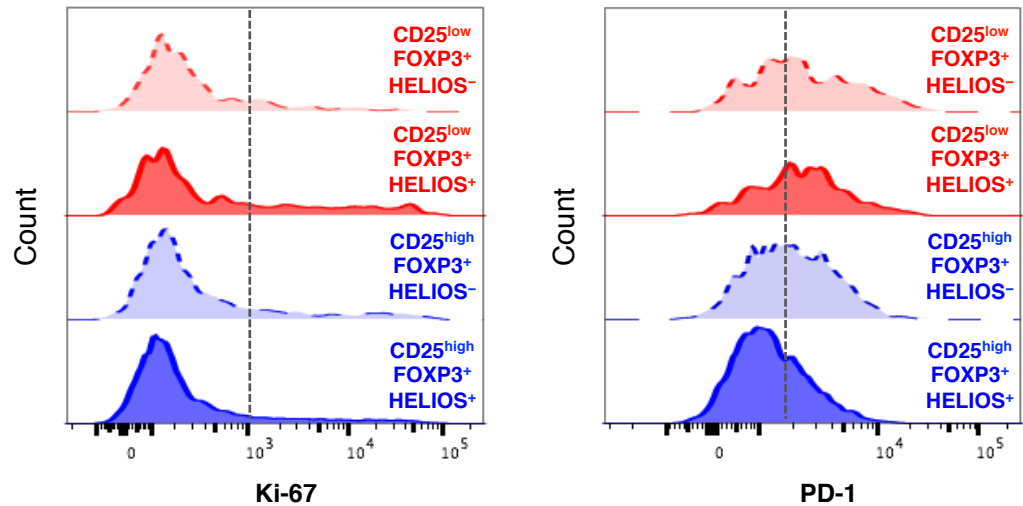

**C**

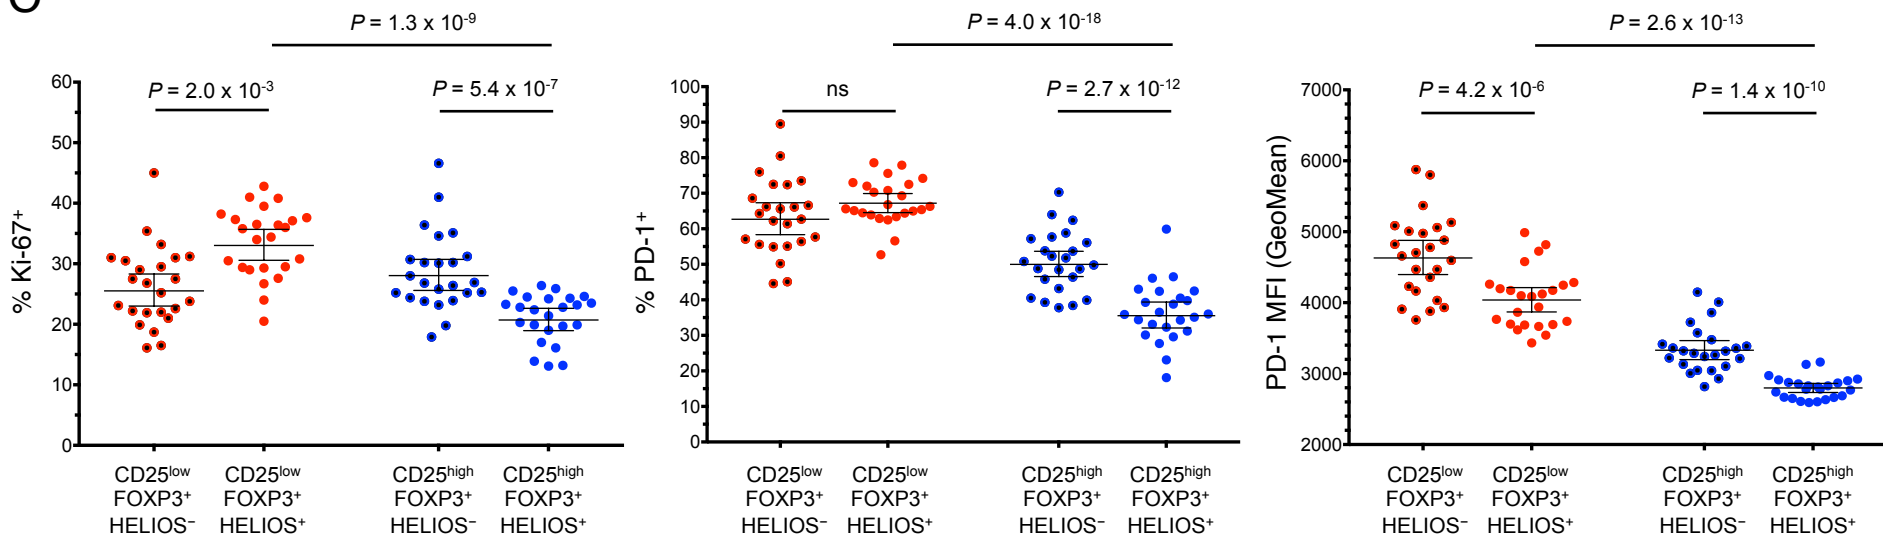



Figure 6

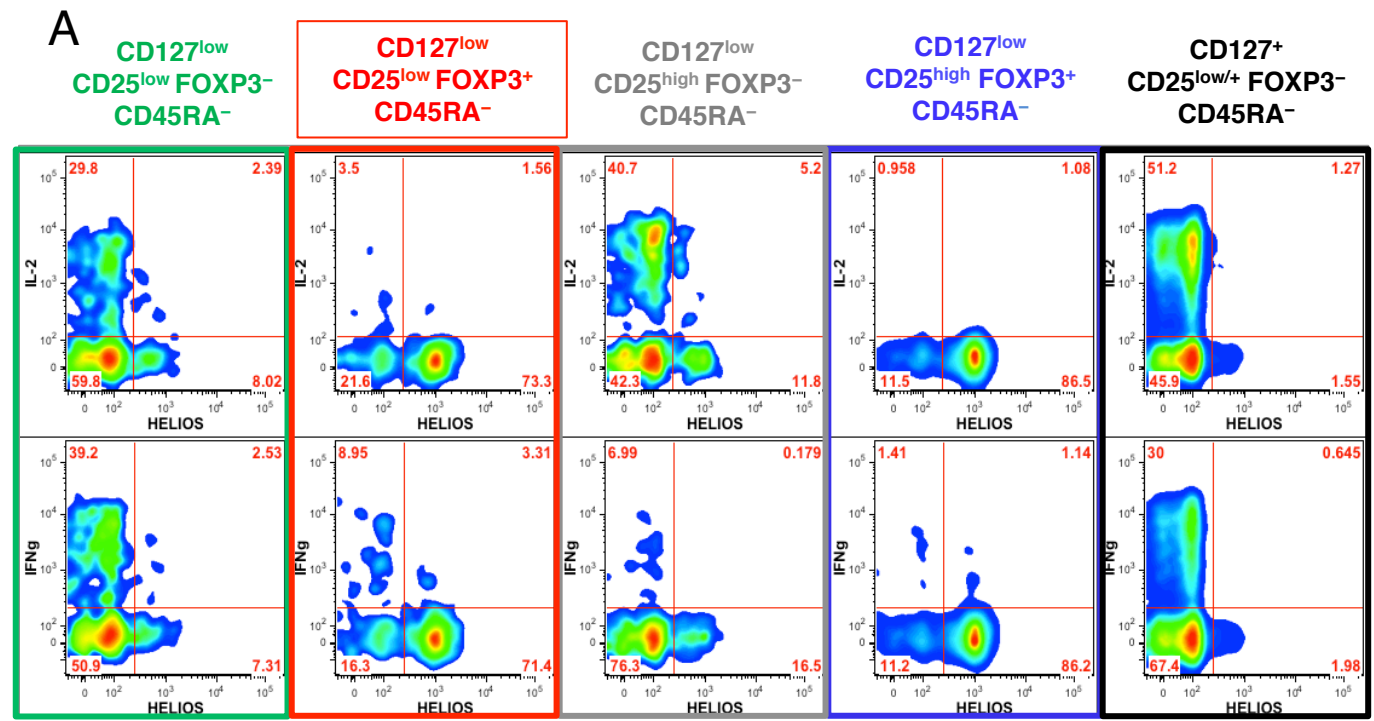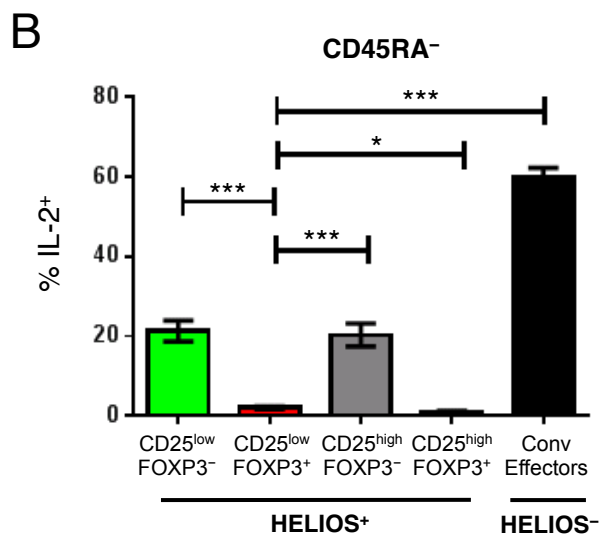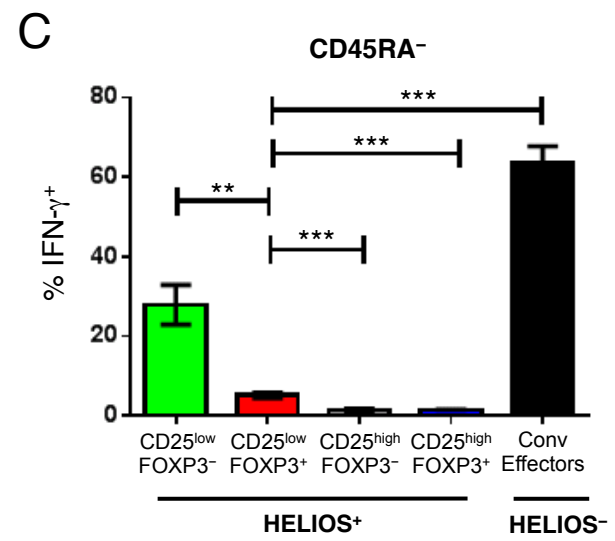

Figure 7

A

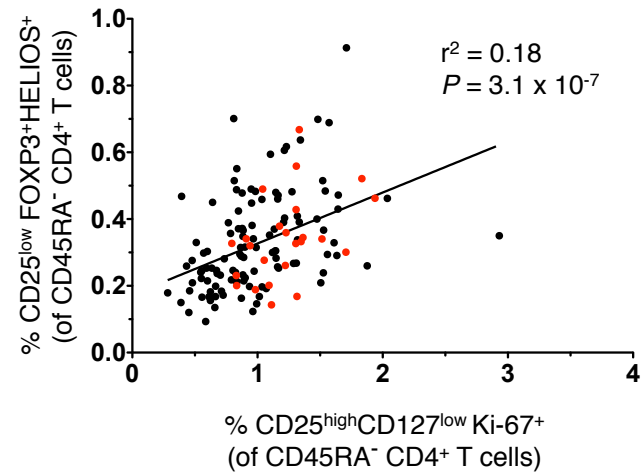

B

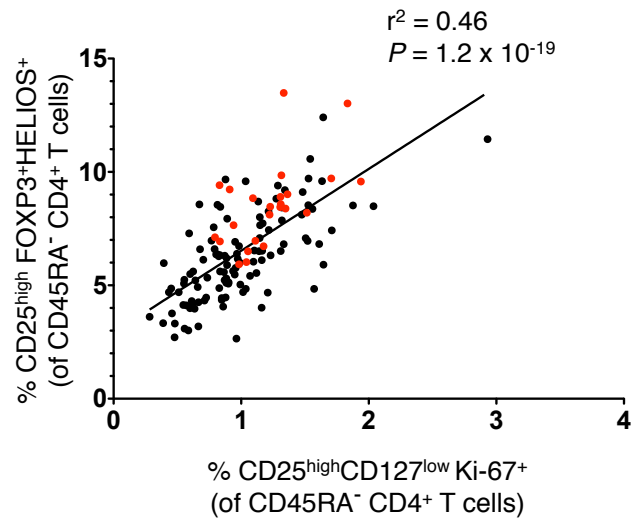

C

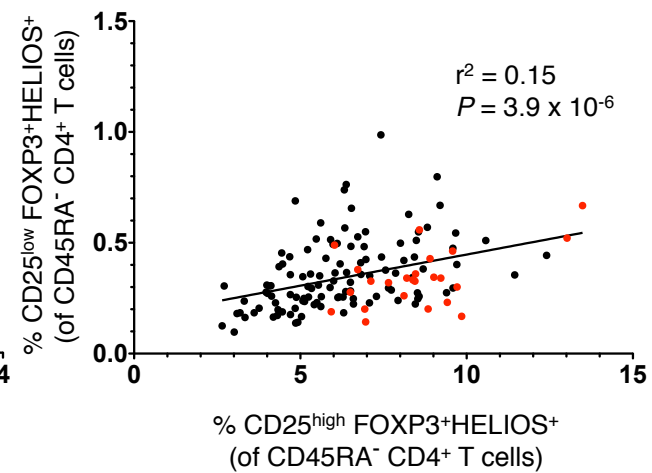

Fig S1

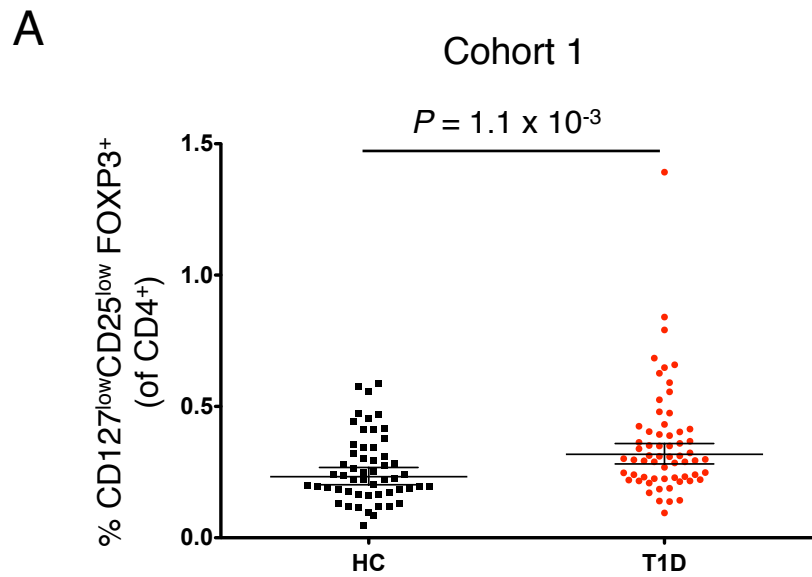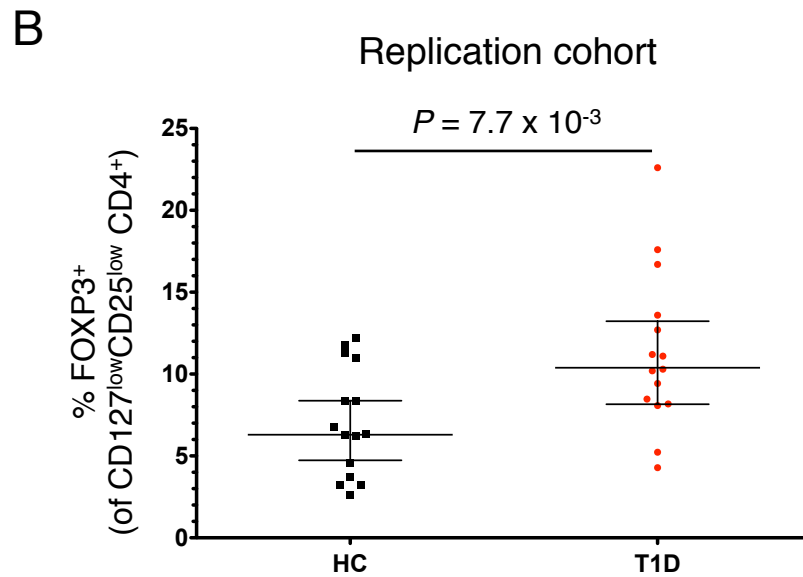

Fig S2

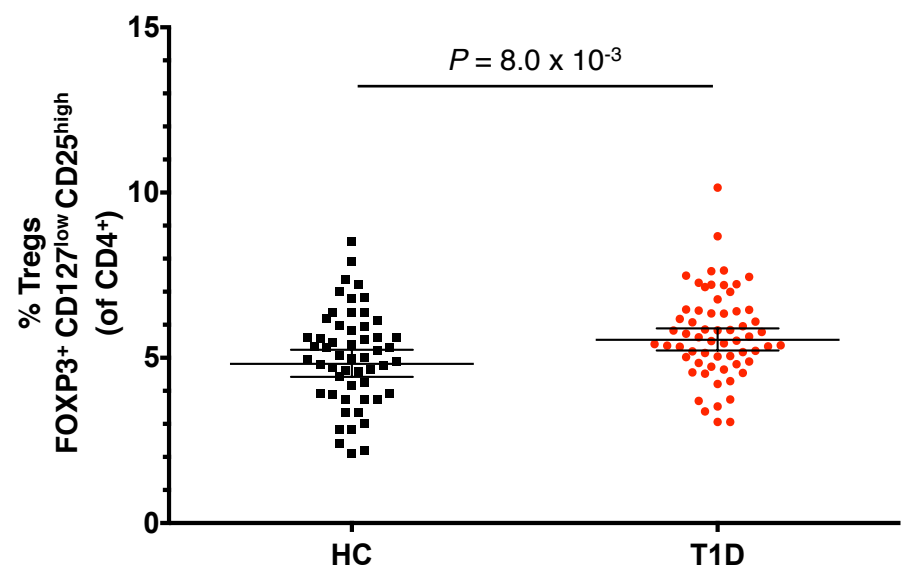

Fig S3

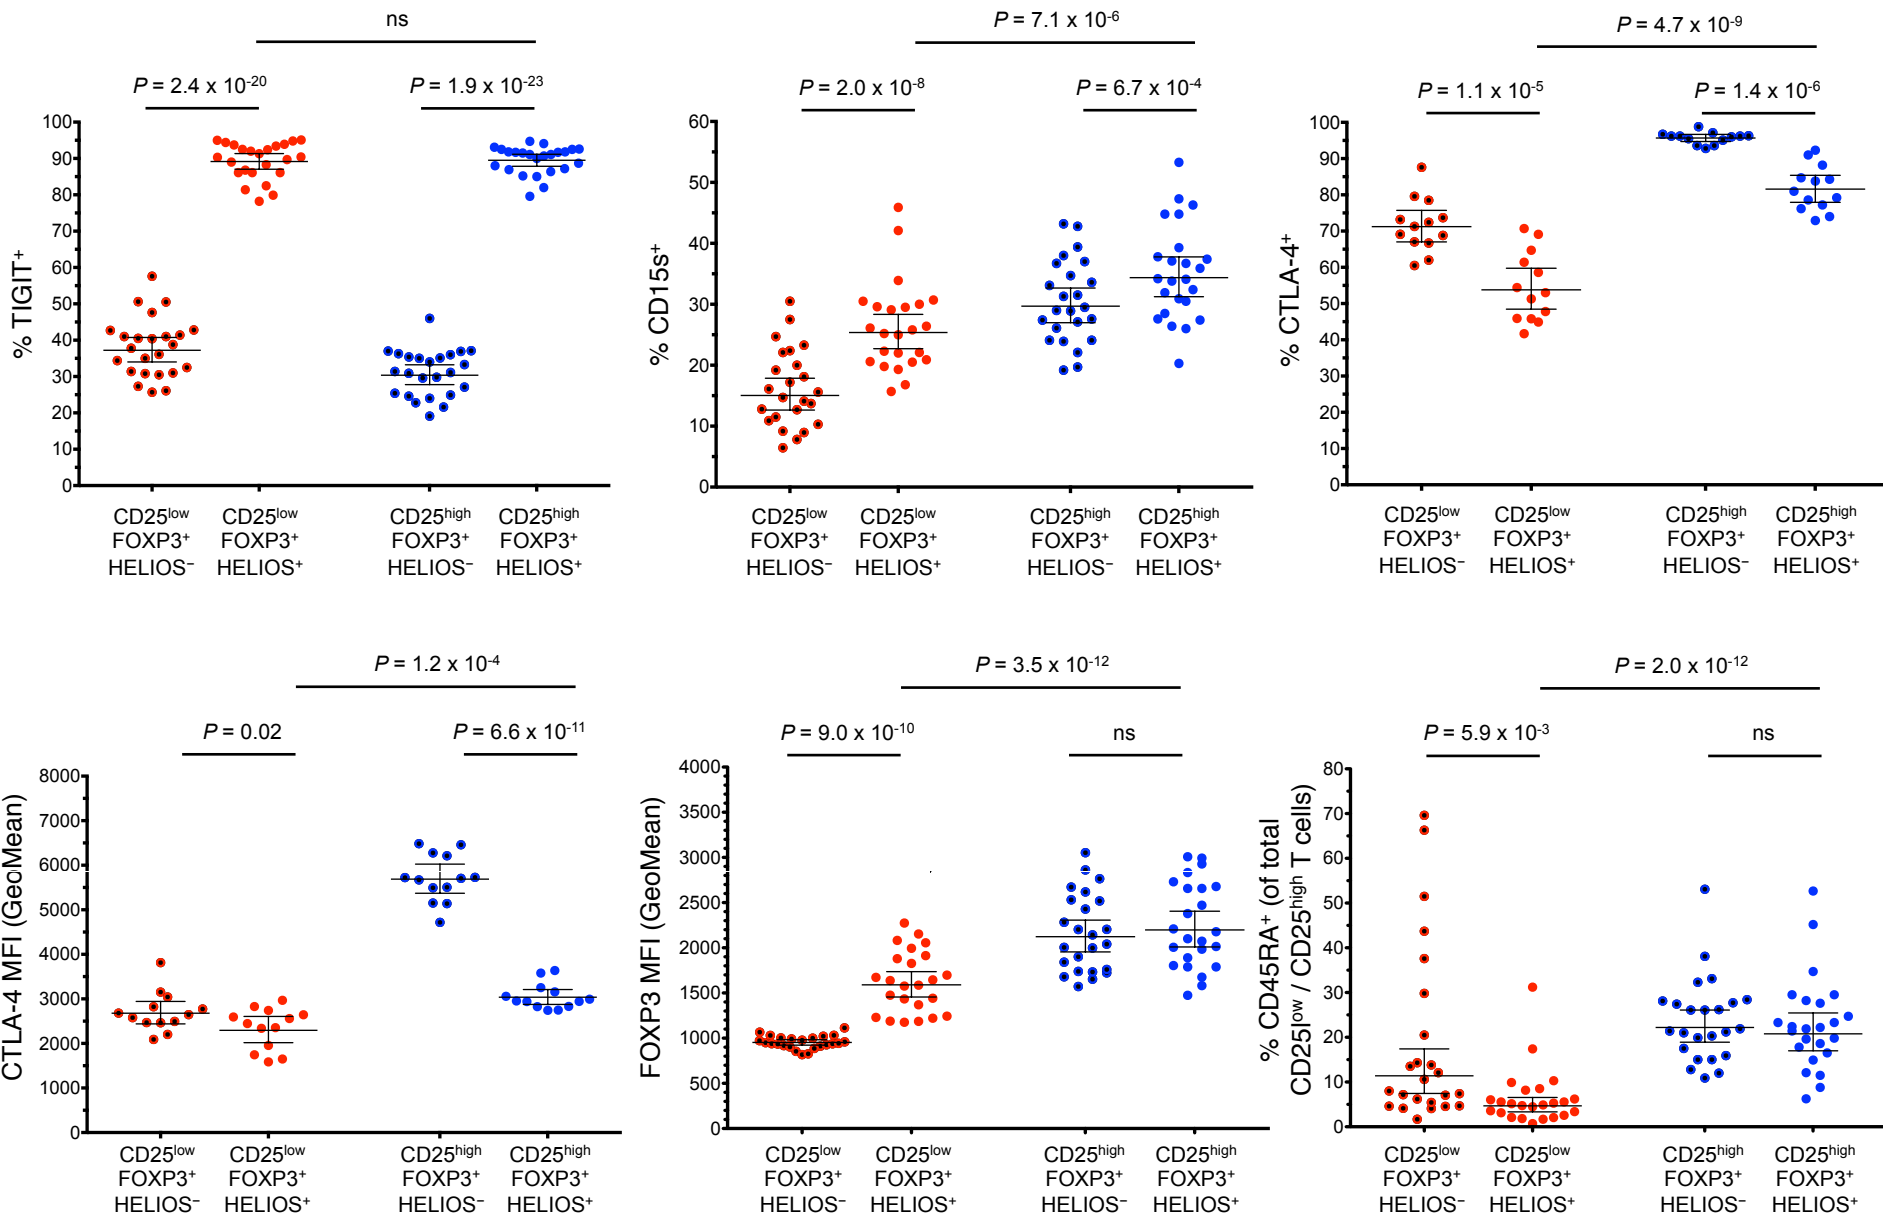

Fig S4

A

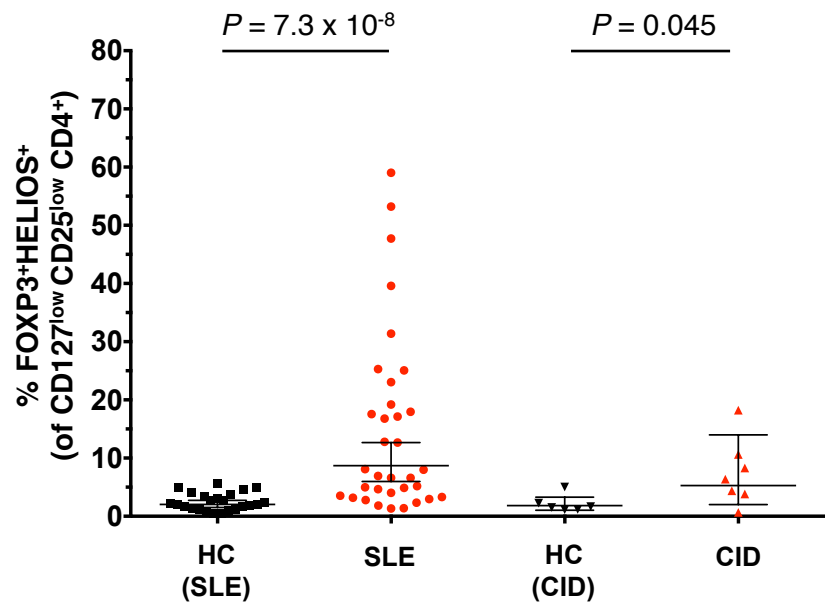

B

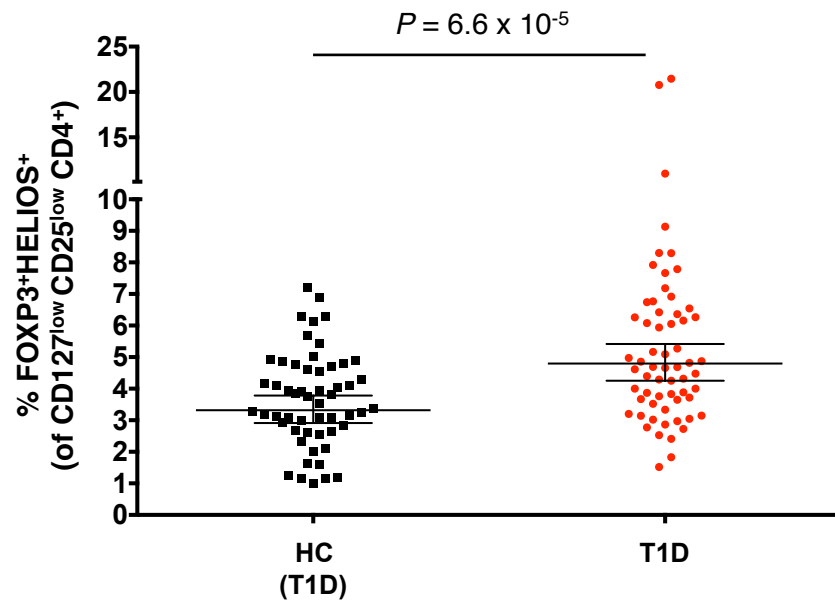

C

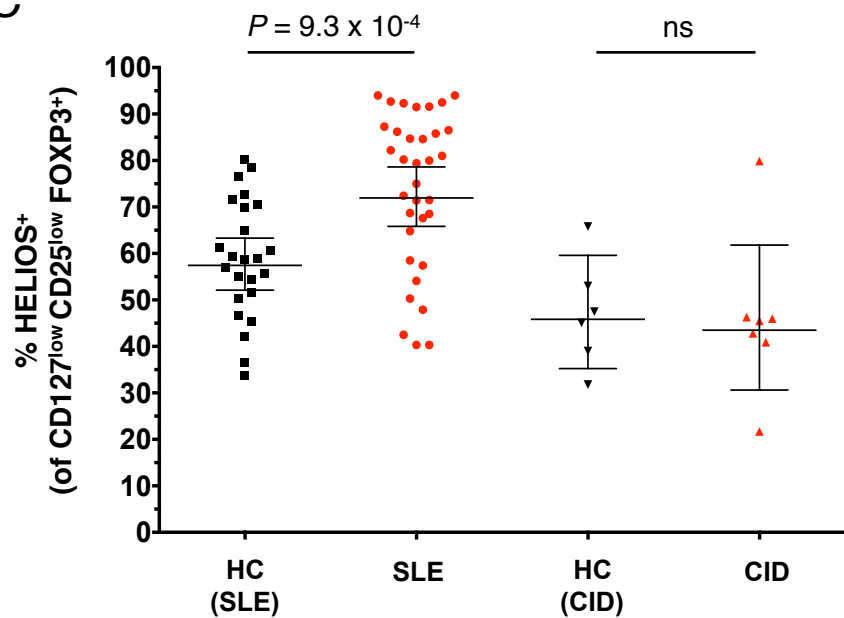

D

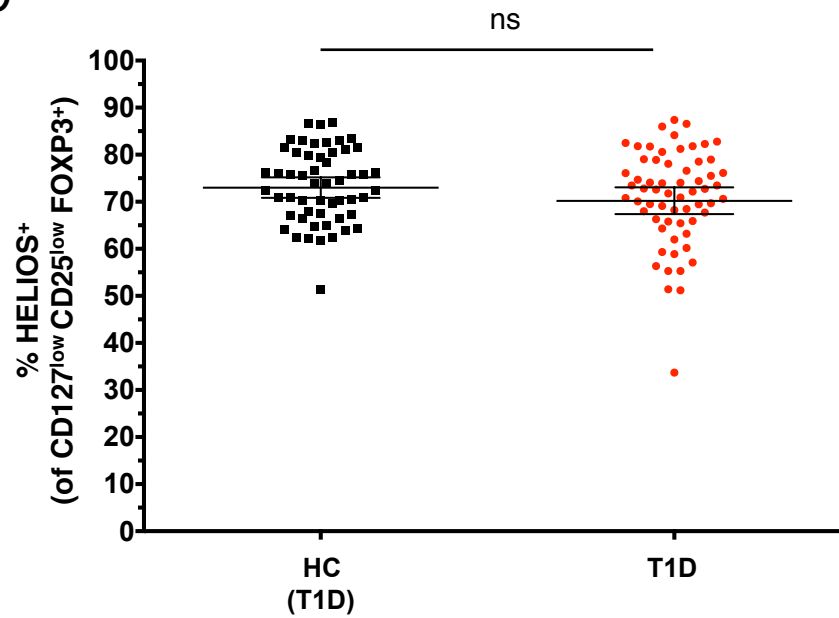

A

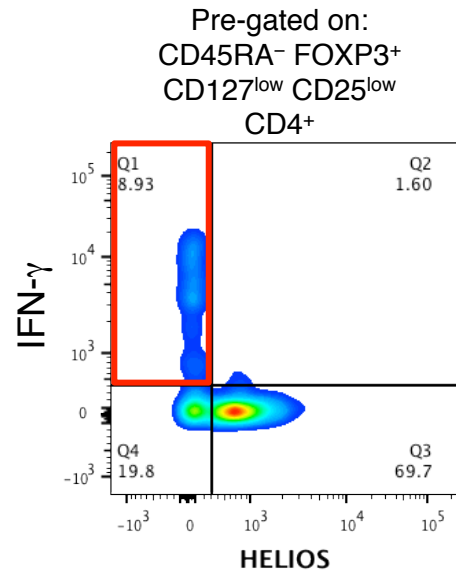

B

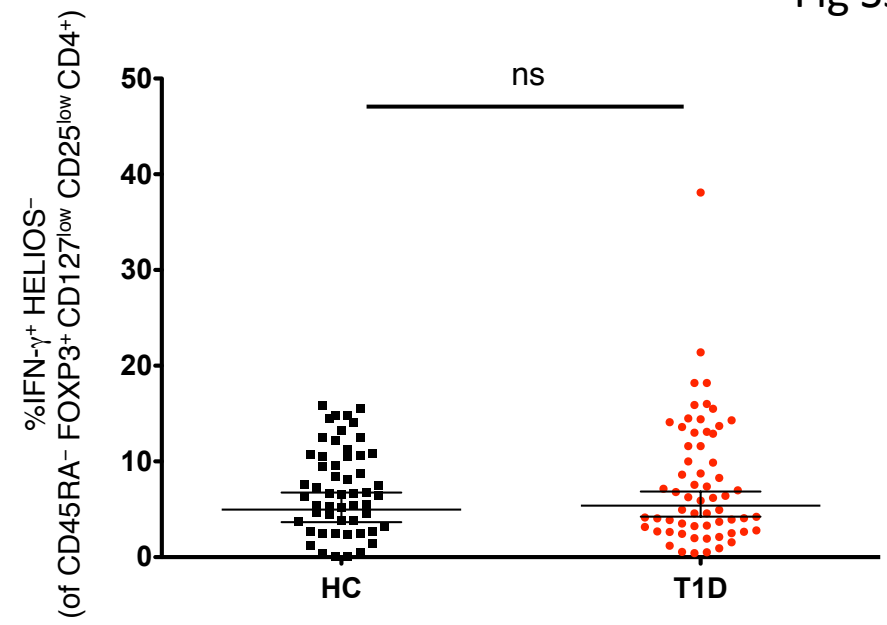

C

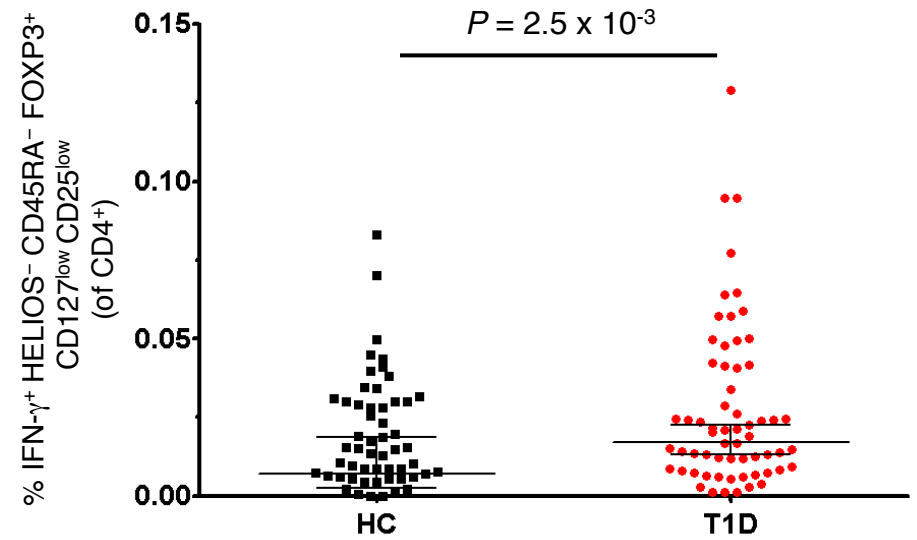

**Table 1. Baseline characteristics of study participants included in the association analyses**

| Cohort                                   | N         | Age       |             | Male<br>N (%)     | Duration of disease |              |
|------------------------------------------|-----------|-----------|-------------|-------------------|---------------------|--------------|
|                                          |           | (years)   |             |                   | (months)            |              |
|                                          |           | Median    | Range       | Median            | Range               |              |
| <b><i>Autoimmune disease cohorts</i></b> |           |           |             |                   |                     |              |
| SLE                                      | 34        | 36        | 20-72       | 2 (5.9%)          | N/A                 | N/A          |
| Healthy controls (CBR) - cohort 1        | 24        | 42        | 22-62       | 1 (4.2%)          | N/A                 | N/A          |
| Healthy controls (CBR) - cohort 2        | 112       | 49        | 26-78       | 30 (26.8%)        | N/A                 | N/A          |
| CID                                      | 7         | 23        | 13-45       | 5 (71.4%)         | N/A                 | N/A          |
| Healthy controls (CBR)                   | 6         | 34        | 17-47       | 4 (66.7%)         | N/A                 | N/A          |
| <b><i>T1D discovery cohort</i></b>       |           |           |             |                   |                     |              |
| T1D (D-GAP) <sup>1</sup>                 | 49        | 13        | 6-34        | 32 (65.3%)        | 11                  | 2-42         |
| T1D (CBR) <sup>2</sup>                   | 15        | 32        | 22-32       | 5 (33.3%)         | 198                 | 6-276        |
| <i>T1D<br/>(combined)</i>                | <i>64</i> | <i>14</i> | <i>6-42</i> | <i>37 (58.0%)</i> | <i>22</i>           | <i>2-276</i> |
| Unaffected Siblings (D-GAP) <sup>3</sup> | 40        | 13        | 6-31        | 21 (52.5%)        | N/A                 | N/A          |
| Healthy Controls (CBR)                   | 15        | 27        | 18-37       | 4 (26.7%)         | N/A                 | N/A          |
| <i>Healthy controls<br/>(combined)</i>   | <i>55</i> | <i>15</i> | <i>6-37</i> | <i>28 (45.9%)</i> | <i>N/A</i>          | <i>N/A</i>   |
| <b><i>T1D replication cohort</i></b>     |           |           |             |                   |                     |              |
| T1D (CBR)                                | 15        | 37        | 17-52       | 5 (33.3%)         | N/A                 | N/A          |



|                        |    |    |       |           |     |        |
|------------------------|----|----|-------|-----------|-----|--------|
| Healthy Controls (CBR) | 15 | 37 | 22-47 | 4 (26.7%) | 240 | 24-240 |
|------------------------|----|----|-------|-----------|-----|--------|

Baseline characteristics for the study participants stratified by the study cohorts. <sup>1</sup>Newly diagnosed T1D patients (duration of disease  $\leq$  3 years) enrolled in the Diabetes - Genes, Autoimmunity and Prevention (D-GAP) study. <sup>2</sup>Long-standing adult T1D patients enrolled from the Cambridge BioResource (CBR). <sup>3</sup>First-degree sibling of a T1D patient, reporting no autoimmune disease and determined to be negative for the following T1D-associated autoantibodies: IAA, IA2, GAD and ZnT8. CID, Combined immunodeficiency; T1D, type 1 diabetes; SLE; systemic lupus erythematosus.
